# Supplementary material for: Benzodithieno-imidazole based π-conjugated fluorescent polymer probe for selective sensing of Cu2+
Source: Royal Society of Chemistry journal article supplement (doi:10.1039/c5ra14079j), 2015-01-01
Supplement: c5ra14079j1.pdf [file c5ra14079j1.pdf]

Manuscript ID: RA-ART-07-2015-014079

Revised Supporting information for:

**Benzodithieno-imidazole based  $\pi$ -conjugated fluorescent polymer  
probe for selective sensing of  $\text{Cu}^{2+}$**

Dipanjan Giri and Sanjib K Patra\*

*Department of Chemistry, IIT Kharagpur, Kharagpur 721302, WB, INDIA*

|                                                                                                          |       |
|----------------------------------------------------------------------------------------------------------|-------|
| 1. Experimental (quantum yield, lifetime measurement and solid state PL studies).....                    | 2-3   |
| 2. Characterization .....                                                                                | 4-19  |
| 2.a NMR Spectra .....                                                                                    | 4-14  |
| 2.b HRMS data.....                                                                                       | 15-16 |
| 2.c FTIR spectra.....                                                                                    | 17-19 |
| 3. Crystallographic data of <b>4b</b> .....                                                              | 20-21 |
| 4. Tetradetector GPC for <b>P1</b> and <b>P2</b> .....                                                   | 22-23 |
| 4.a Attempted GRIM polymerization.....                                                                   | 22    |
| 4.b Tetradetector GPC studies of <b>P1</b> and <b>P2</b> .....                                           | 23    |
| 5. Photophysical data.....                                                                               | 24-38 |
| 5.a Photophysical properties of <b>4a</b> and <b>4b</b> .....                                            | 24    |
| 5.b Photophysical response of <b>4a</b> with various metal ion.....                                      | 25    |
| 5.c Selective $\text{Cu}^{2+}$ reorganization studies by <b>4b</b> .....                                 | 26-27 |
| 5.d Titration studies by continuous variation of $\text{Cu}^{2+}$ ion concentration.....                 | 28    |
| 5.e Stern-Volmer plot.....                                                                               | 29    |
| 5.f Photophysical properties of <b>P1</b> and <b>P2</b> .....                                            | 30-32 |
| 5.g Determination of Limit of Detection (LOD).....                                                       | 33    |
| 5.h Energy level diagram and PL quenching mechanism.....                                                 | 34-35 |
| 5.i Electrochemical characterization <b>4b</b> . $\text{Cu}^{2+}$ and <b>P2</b> . $\text{Cu}^{2+}$ ..... | 36    |
| 5.j $\text{Cu}^{2+}$ sensing by thin film of <b>P2</b> with time.....                                    | 37    |
| 5.k SEM and EDX analysis of <b>P2</b> and <b>P2</b> . $\text{Cu}^{2+}$ .....                             | 37-38 |
| 6. References .....                                                                                      | 38    |

## 1. Determination of Quantum yield and Life time:

All the UV–Vis absorption and fluorescence emission spectra were collected using a Shimadzu (model UV 2450) UV–Vis spectrophotometer and a Spex Fluorolog-3 (model FL3–11) spectrofluorimeter, respectively. Throughout all the measurements, the concentration was maintained at ( $\sim 2 \times 10^{-5}$ ) M.

Fluorescence quantum yields were measured with respect to a secondary standard quinine sulphate ( $\lambda_{\text{abs}}=349$  nm) in 0.1 M H<sub>2</sub>SO<sub>4</sub> ( $\Phi = 0.57$ ) at 298 K.<sup>1</sup>The following equation was used to calculate the quantum yields:

$$\frac{\Phi_R}{\Phi_S} = \frac{A_S}{A_R} \times \frac{(Abs)_R}{(Abs)_S} \times \frac{\eta_S^2}{\eta_R^2} \quad (1)$$

Here  $\Phi$  represents the quantum yield, (Abs) represents the absorbance, A represents the area under the fluorescence curve, and  $\eta$  is the refractive index of the medium.  $\eta_{\text{DMSO}/\text{H}_2\text{O}}$  was calculated using Arago-biot (AB) equation.<sup>2</sup> The subscript S and R denotes the corresponding parameters for the sample and reference, respectively.

**Experimental details for TCSPC measurement:** The time-resolved emission decays were recorded using a Time-Correlated Single Photon Counting (TCSPC) picoseconds spectrophotometer.<sup>3</sup> The fluorescence decay response of **4b** and **P2** and their coordinated complexes with Cu<sup>2+</sup> was investigated in DMSO:H<sub>2</sub>O. The solution of Cu<sup>2+</sup> cation was prepared in water and was added to the stock solution of **4b** and **P2** which were prepared in DMSO by maintaining the 1:1 metal ligand ratio. All the samples were excited using a picosecond diode laser at 336 nm (IBH, UK, Nanoled), and the signals were recorded at magic angle (54.71) using a Hamamatsu microchannel plate photomultiplier tube (3809U). The typical instrument response function in our setup is 100 ps. The instrument response function of our setup is  $\sim 800$  ps. Time-resolved fluorescence decays were analyzed using IBH DAS-6 decay analysis software.

### Preparation of thin film for solid state PL measurement:

The quartz substrates (17 x 15 x 1 mm<sup>3</sup>) were cleaned in a fresh piranha solution (7:3 mixture of 98% H<sub>2</sub>SO<sub>4</sub>/30% H<sub>2</sub>O<sub>2</sub>), washed with Milli-Q water, and followed by ultrasonication in alkaline isopropanol and 0.1 M aqueous HCl at 60°C for 1 h each. After

careful washing with Milli-Q water, thin film of the polymer **P2** was prepared by spin coating on quartz plate. A solution of **P2** in toluene ( $\sim 3 \times 10^{-4}\text{M}$ ) was dropped on quartz plate and it was spin coated at 5000 rpm for 60 second followed by 8000 rpm for 120 seconds. PL data of the polymer film was measured. After that the film was dipped in different concentration of aqueous  $\text{Cu}^{2+}$  solution for 30 min followed by repetitive and extensive washing (at least 20 times) by Milli-Q water to remove any unbound (free)  $\text{Cu}^{2+}$  ion. After drying in air, PL response was recorded.

## 2a. NMR spectra

**Fig S1:**  $^1\text{H}$  NMR (400MHz,  $\text{CDCl}_3$ ) of **1**

**Fig S2:**  $^{13}\text{C}\{^1\text{H}\}$  NMR (100MHz,  $\text{CDCl}_3$ ) of **1**

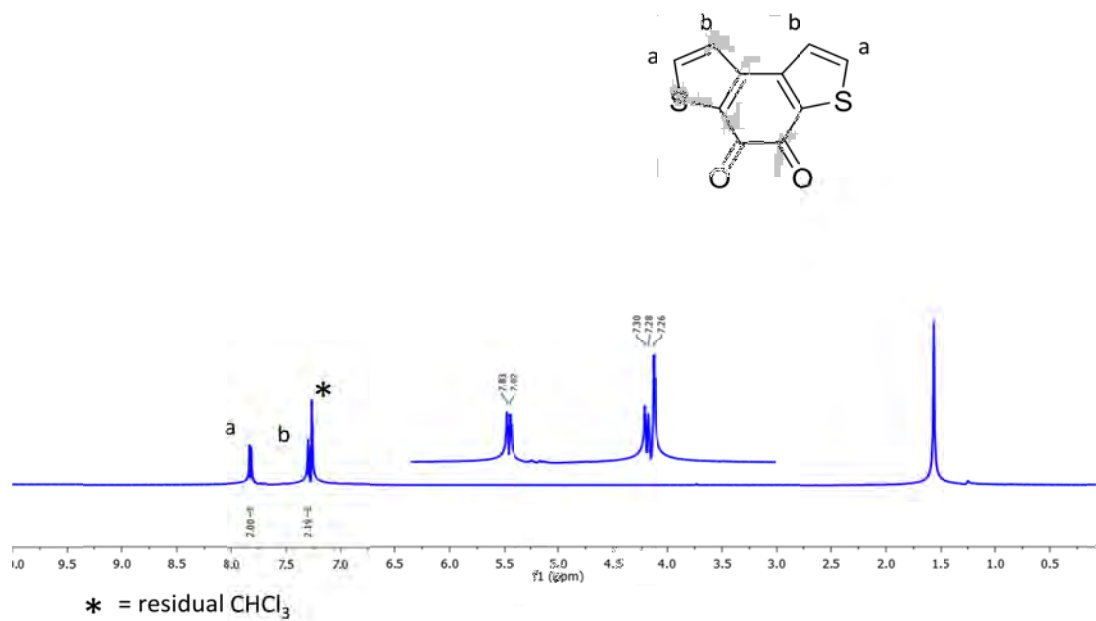Fig S3:  $^1\text{H}$  NMR (400MHz,  $\text{CDCl}_3$ ) of **2**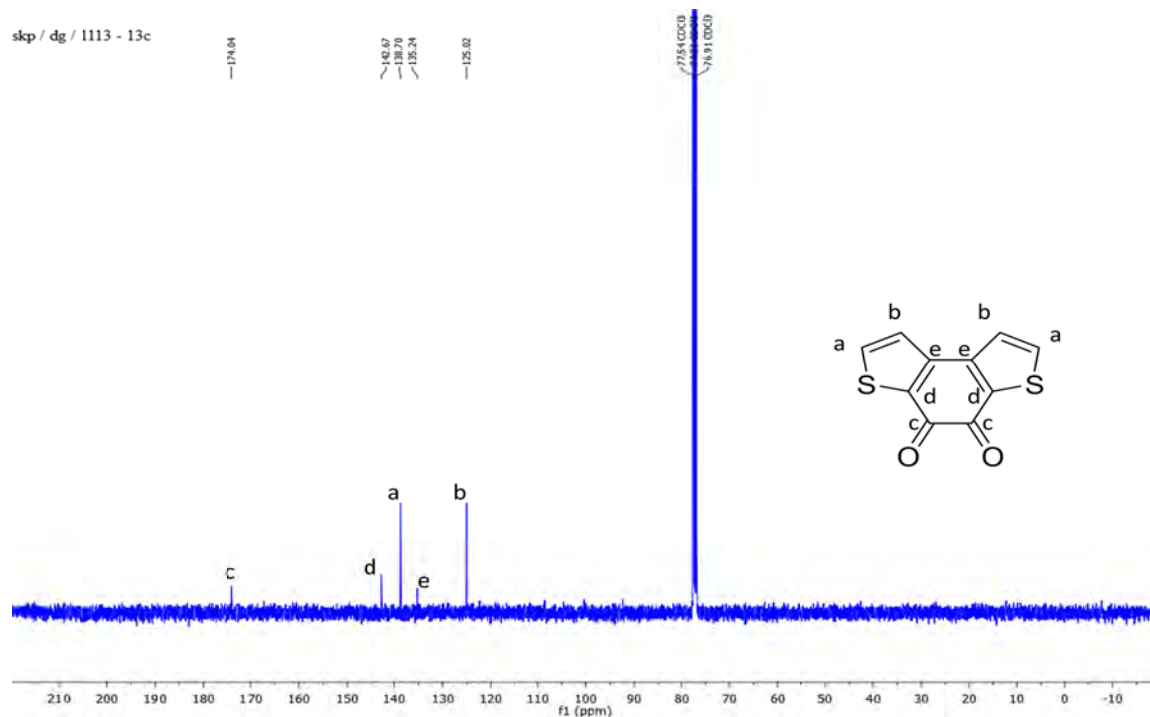Fig S4:  $^{13}\text{C}\{^1\text{H}\}$  NMR (100MHz,  $\text{CDCl}_3$ ) of **2**

skpd5.dg1113 - dept135

138.39  
124.98

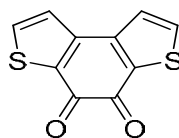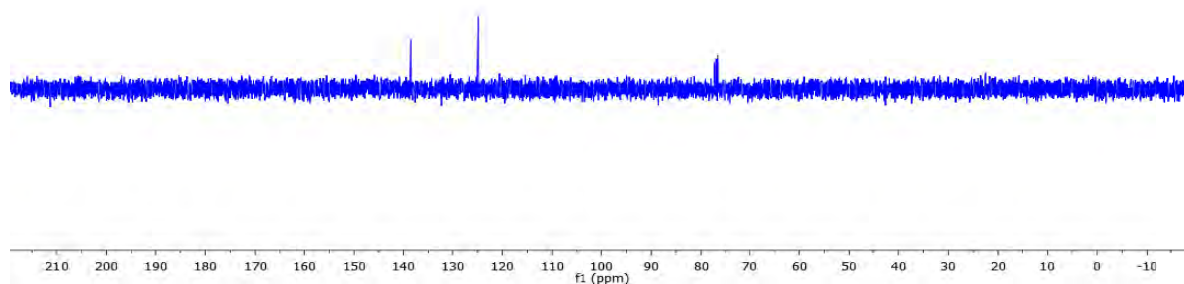

Fig S5: DEPT-135 (100MHz, CDCl<sub>3</sub>) of **2**

skp / dg / 1149p

7.877  
7.800  
7.779  
7.668  
7.666  
7.527  
7.511  
7.337  
7.335  
7.227

4.52  
4.50  
4.48

2.47  
1.94  
1.92  
1.90  
1.88  
1.24  
1.21  
1.22  
1.21  
0.86  
0.84

0.09

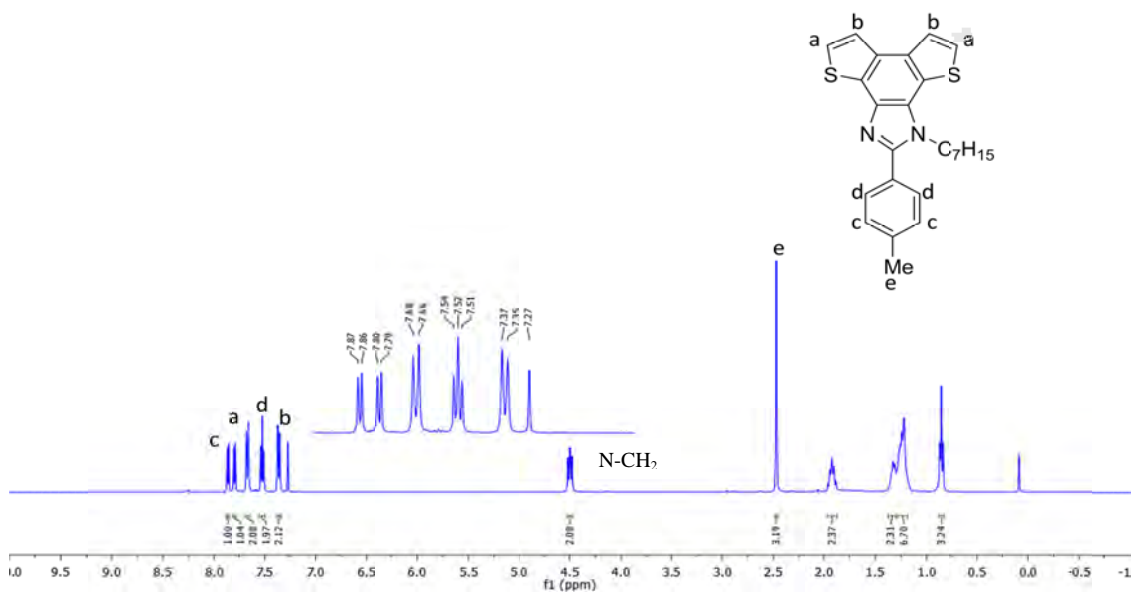

Fig S6: <sup>1</sup>H NMR (600MHz, CDCl<sub>3</sub>) of **4a**

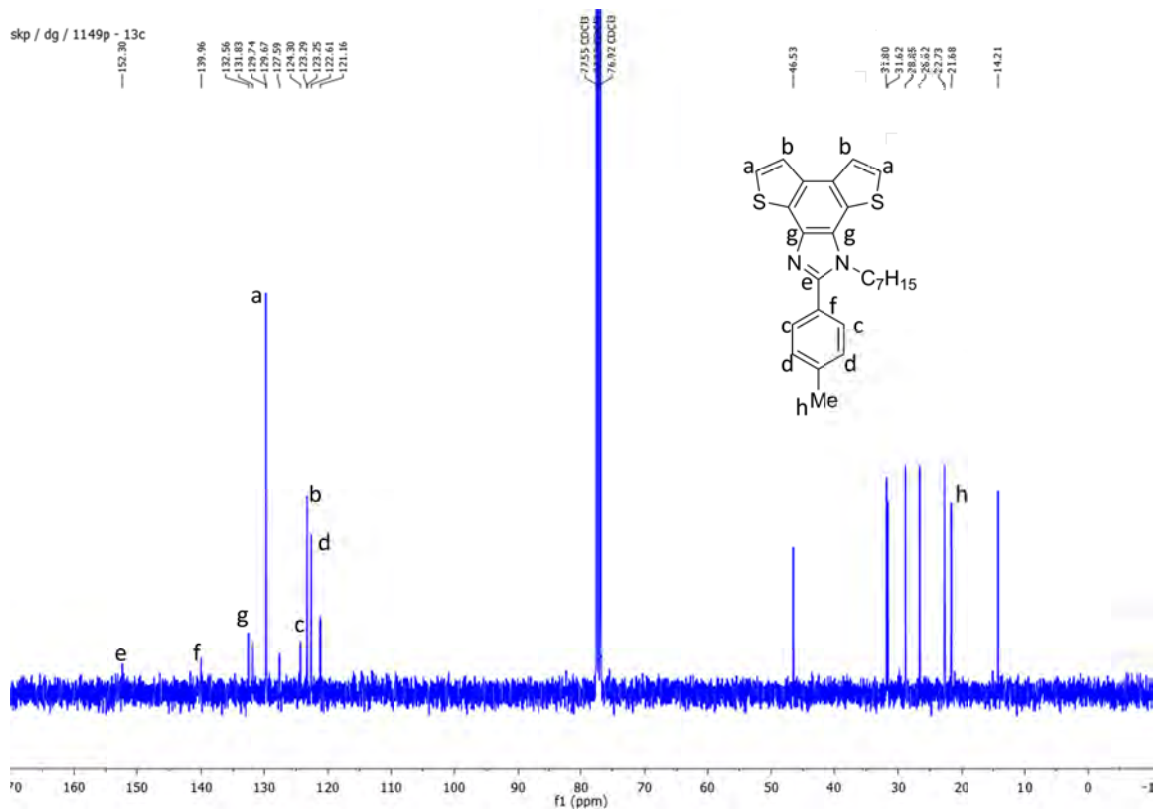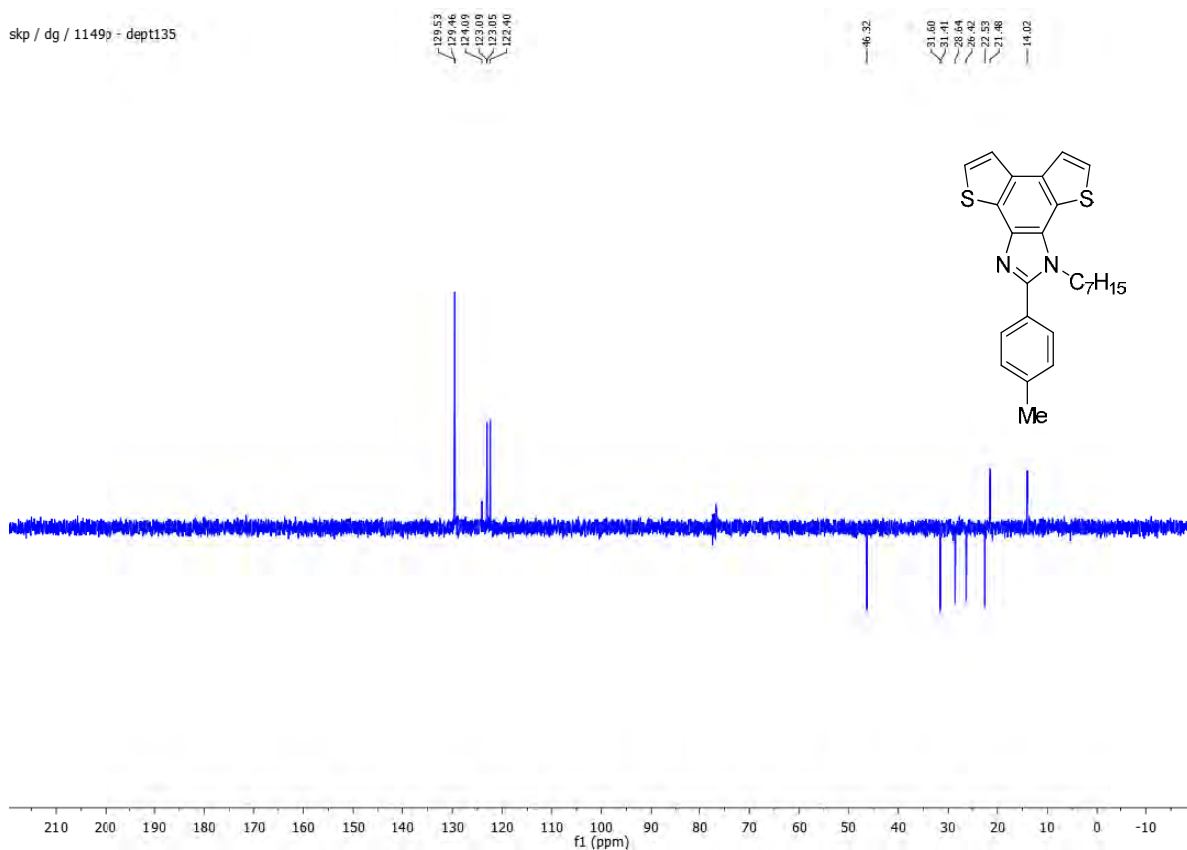

N-CH<sub>2</sub>

**Fig S9:** <sup>1</sup>H NMR (600 MHz, CDCl<sub>3</sub>) of **4b**

**Fig S10:** <sup>13</sup>C{<sup>1</sup>H} NMR (150 MHz, CDCl<sub>3</sub>) of **4b**



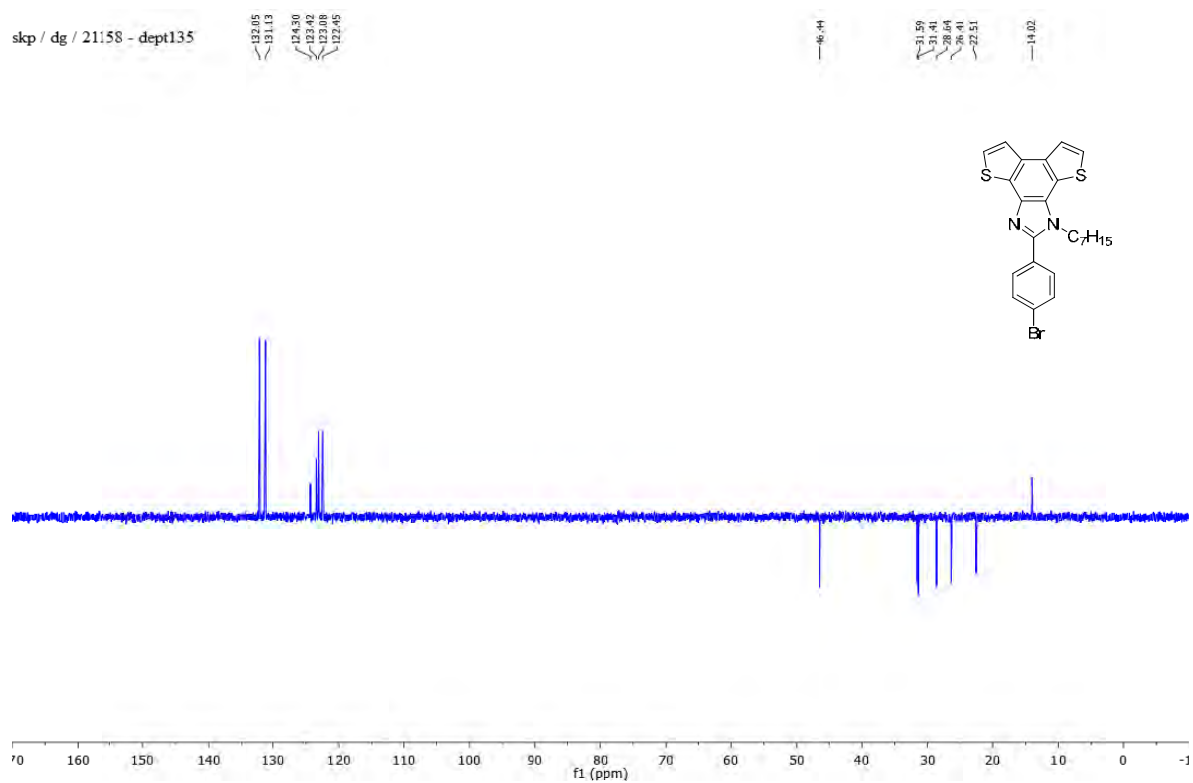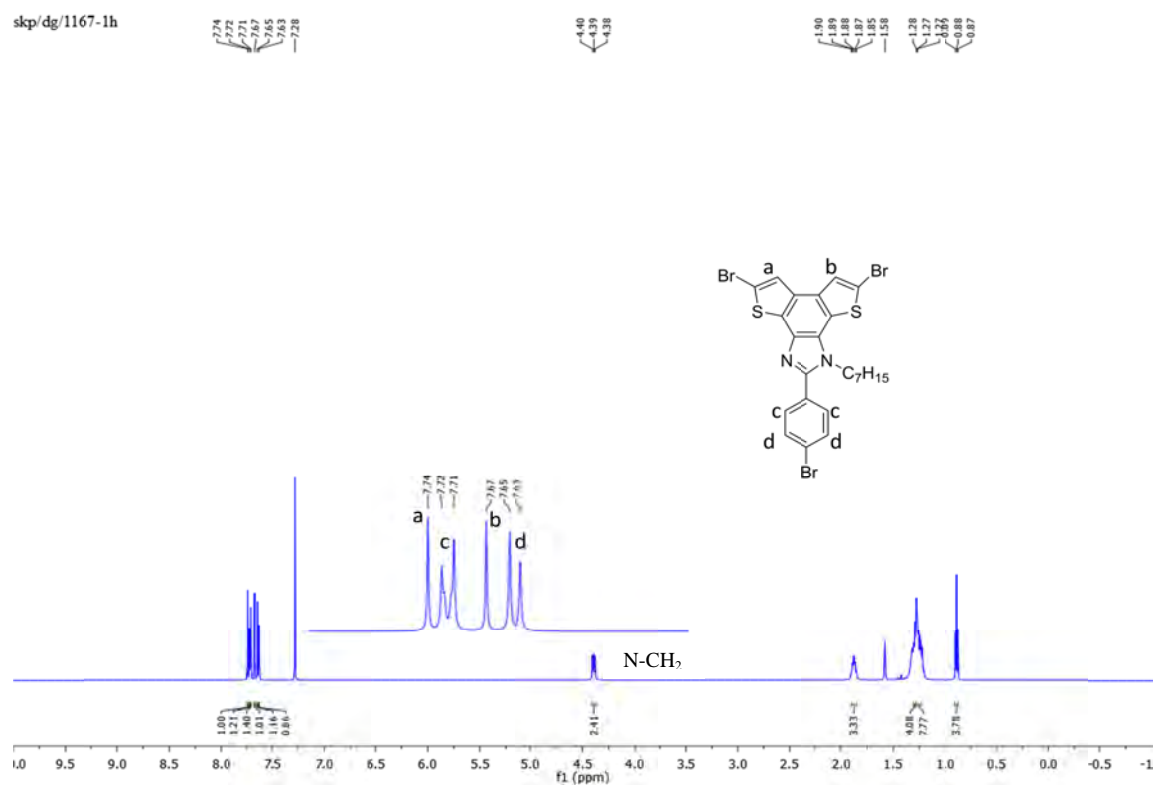

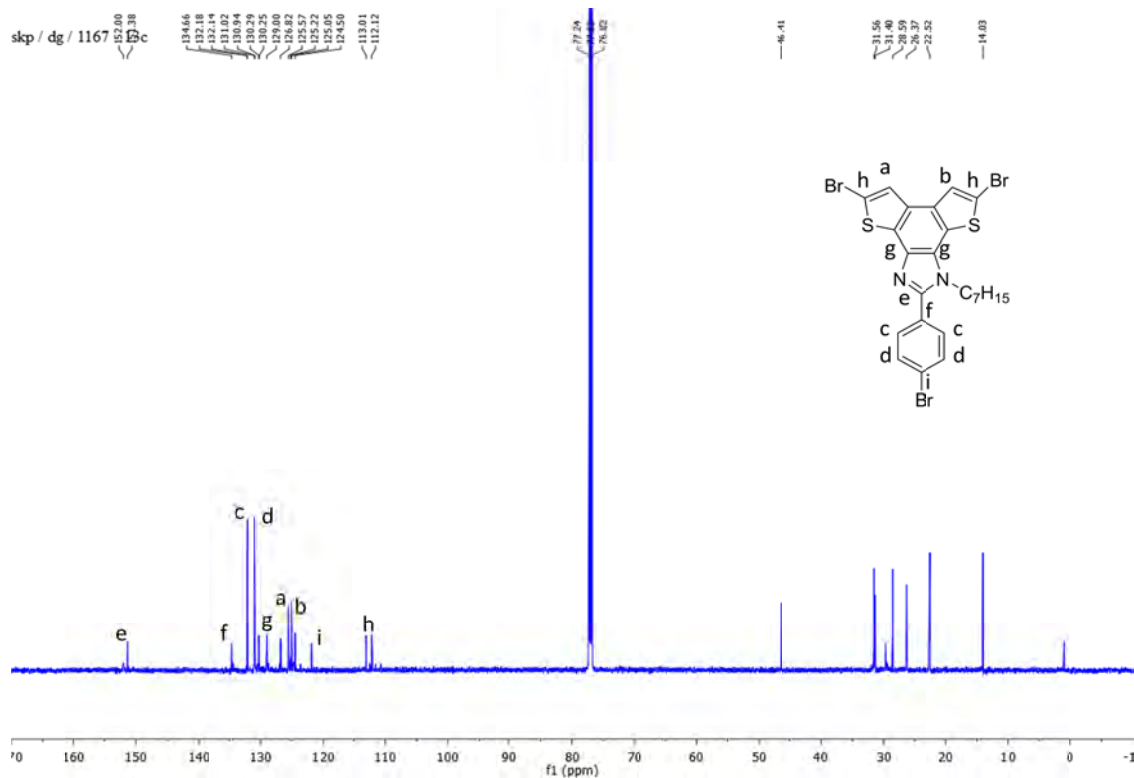

**Fig S13:**  $^{13}\text{C}\{^1\text{H}\}$ NMR (150MHz,  $\text{CDCl}_3$ ) of **5b**

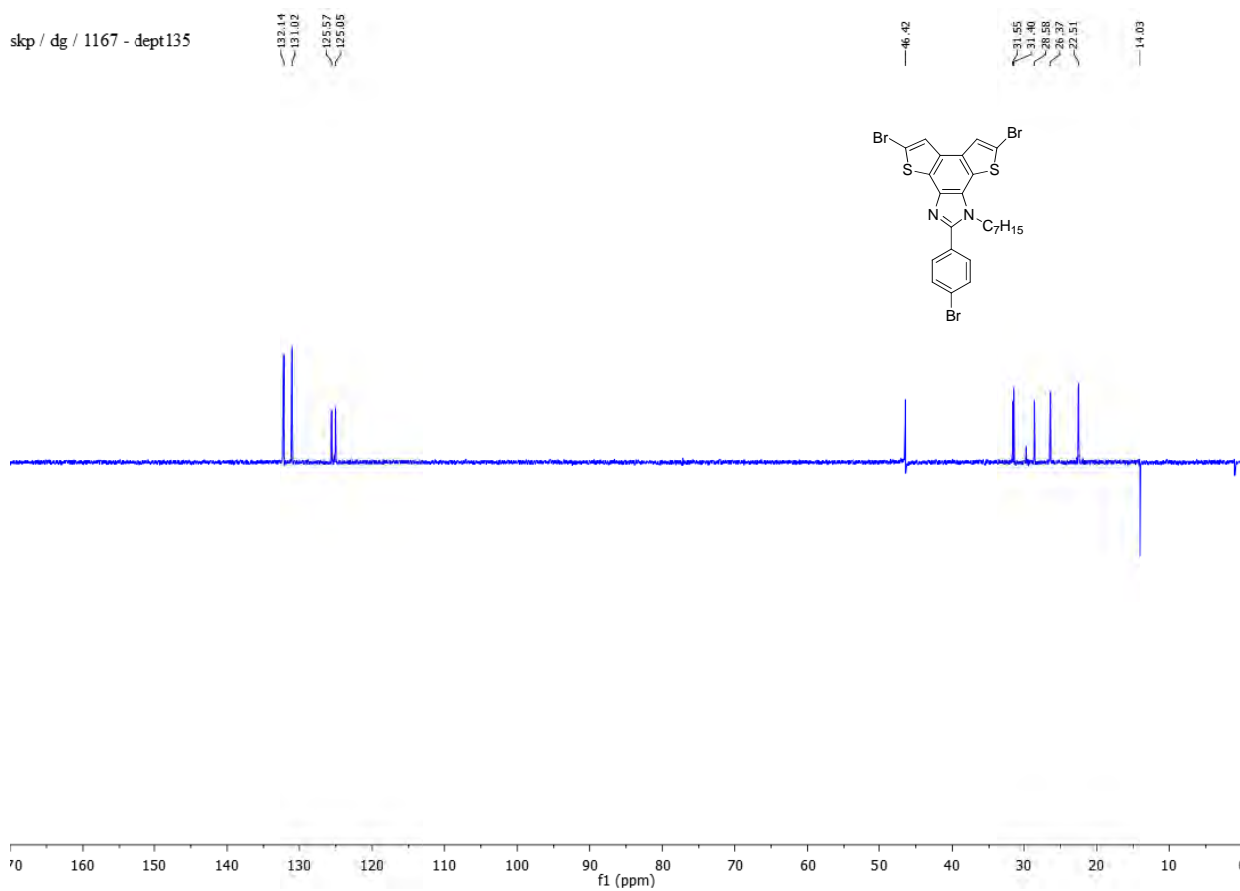

**Fig S14:** DEPT-135 (150MHz,  $\text{CDCl}_3$ ) of **5b**

skp / dg / 2192 f - 1h

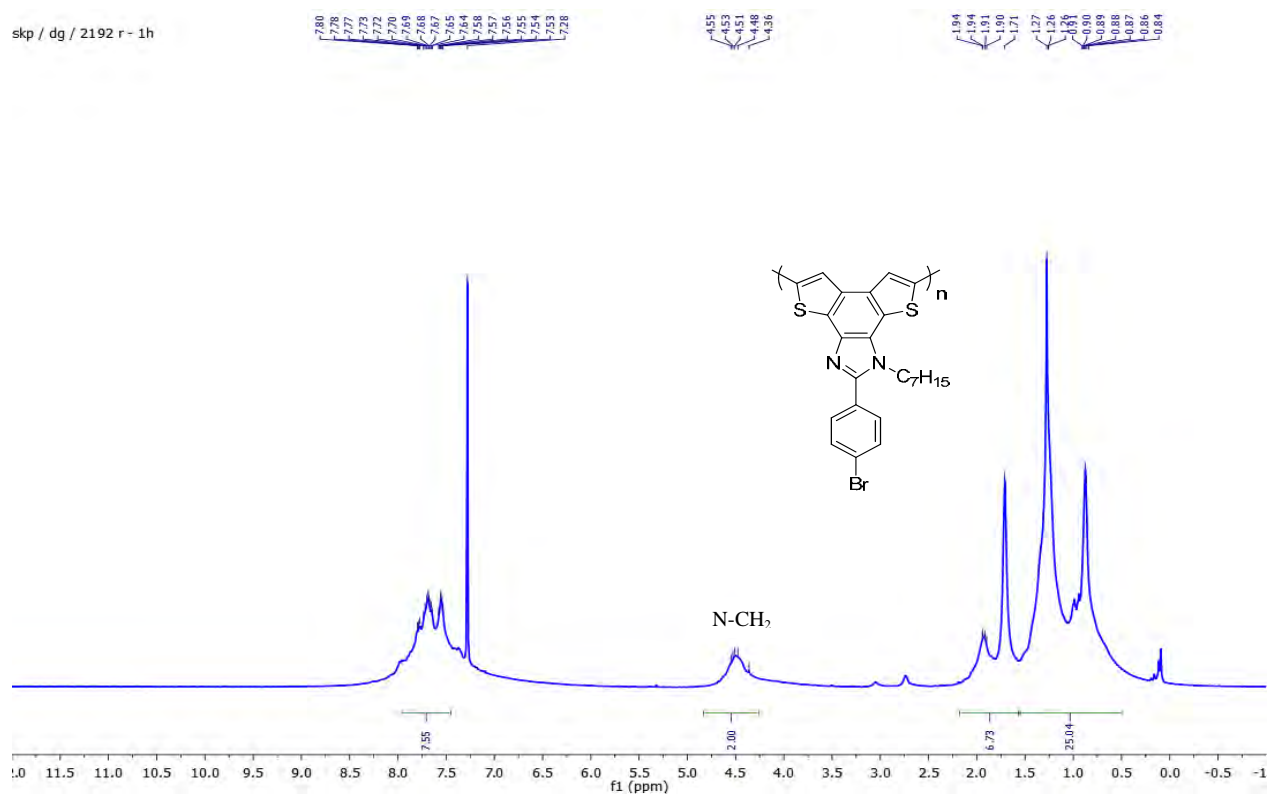

**Fig S15:**  $^1\text{H NMR}$  (600MHz,  $\text{CDCl}_3$ ) of P2

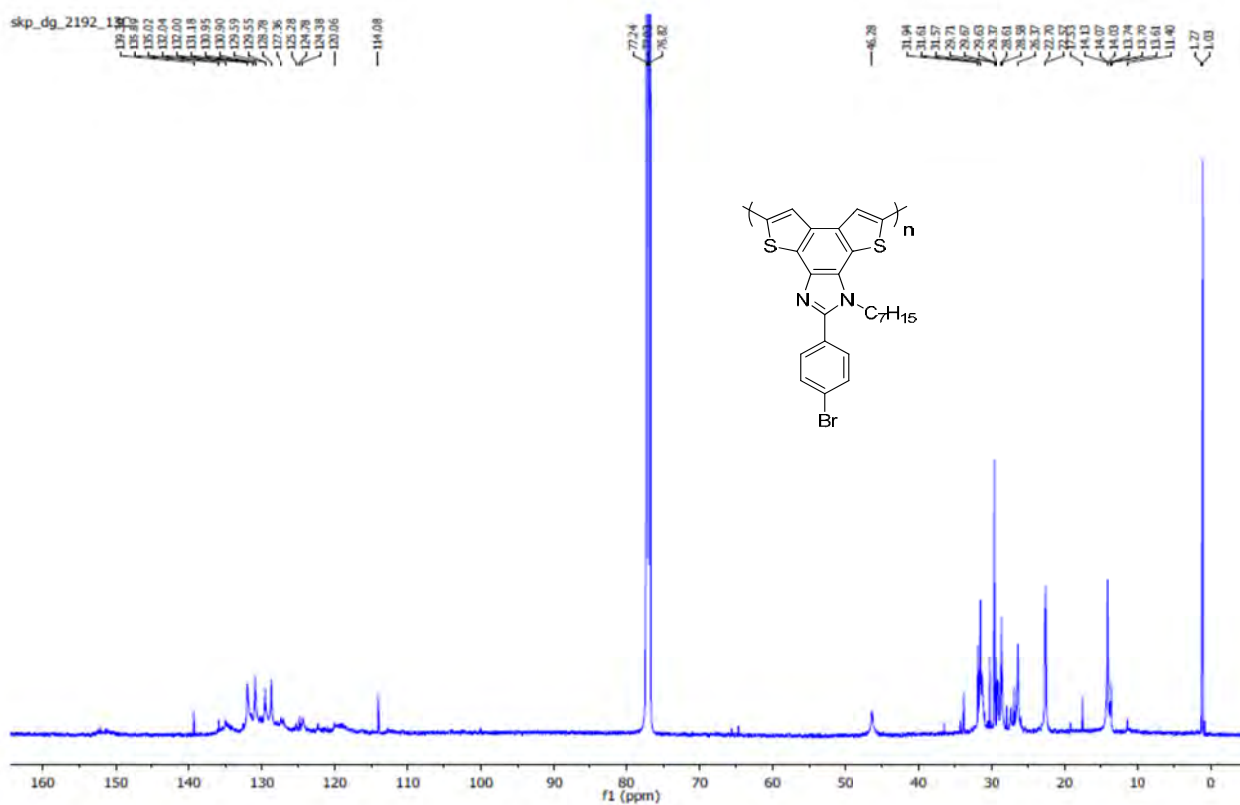

**Fig S16:**  $^{13}C\{^1H\}$ NMR (150MHz,  $CDCl_3$ ) of **P2**

N-CH<sub>2</sub>

**Fig S17:**  $^1H$  NMR (600MHz,  $CDCl_3$ ) of **5a**

**Fig S18:**  $^{13}\text{C}\{^1\text{H}\}$ NMR (150MHz,  $\text{CDCl}_3$ ) of **5a**

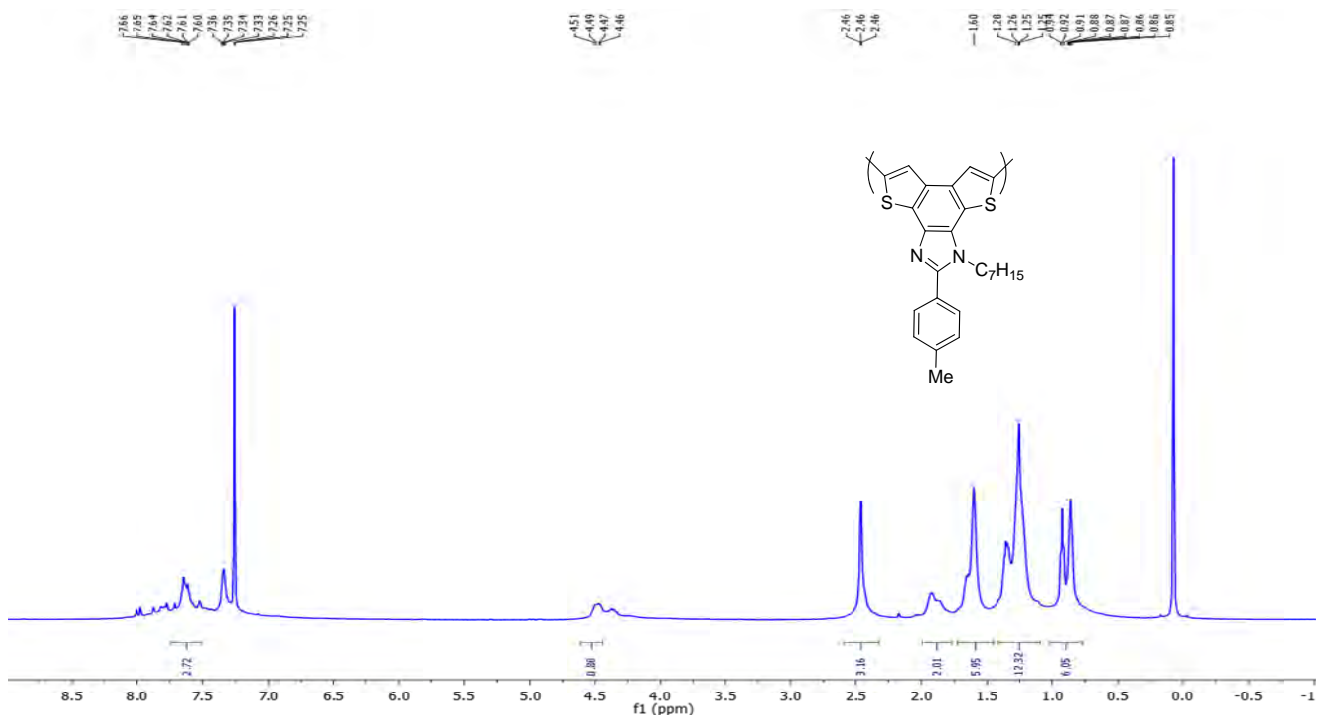

**Fig S19:**  $^1\text{H}$  NMR (600MHz,  $\text{CDCl}_3$ ) of **P1**

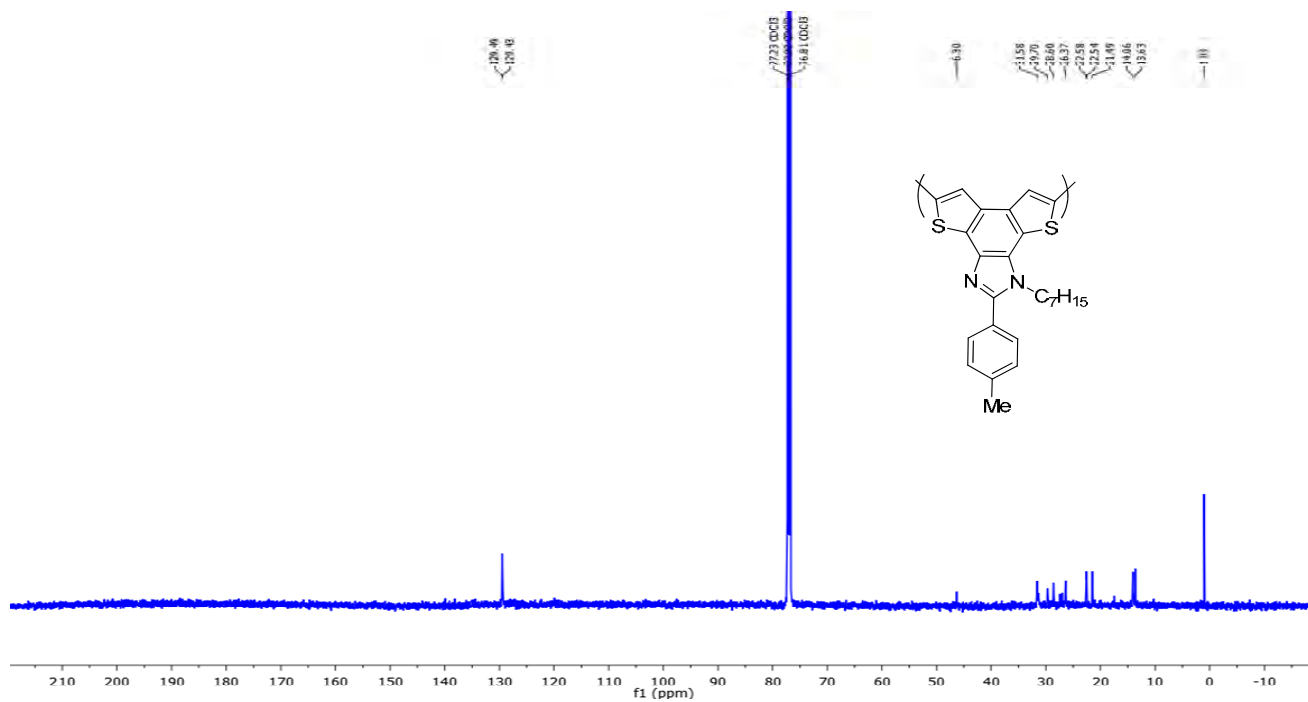

**Fig S20:**  $^{13}\text{C}\{^1\text{H}\}$ NMR (150MHz,  $\text{CDCl}_3$ ) of **P1**

## 2b. HRMS data

**Fig S21:** HRMS( $\text{ESI}^+$ ) spectra of **4a**

**Fig S22:** HRMS( $\text{ESI}^+$ ) spectra of **4b**

**Fig S23:** HRMS( $\text{ESI}^+$ ) spectra of **5b**

**Fig S24:** MALDI-TOF spectra of  $[(\mathbf{4b})_2\text{Cu}^{2+}]$  complex



## 2c. FTIR spectra

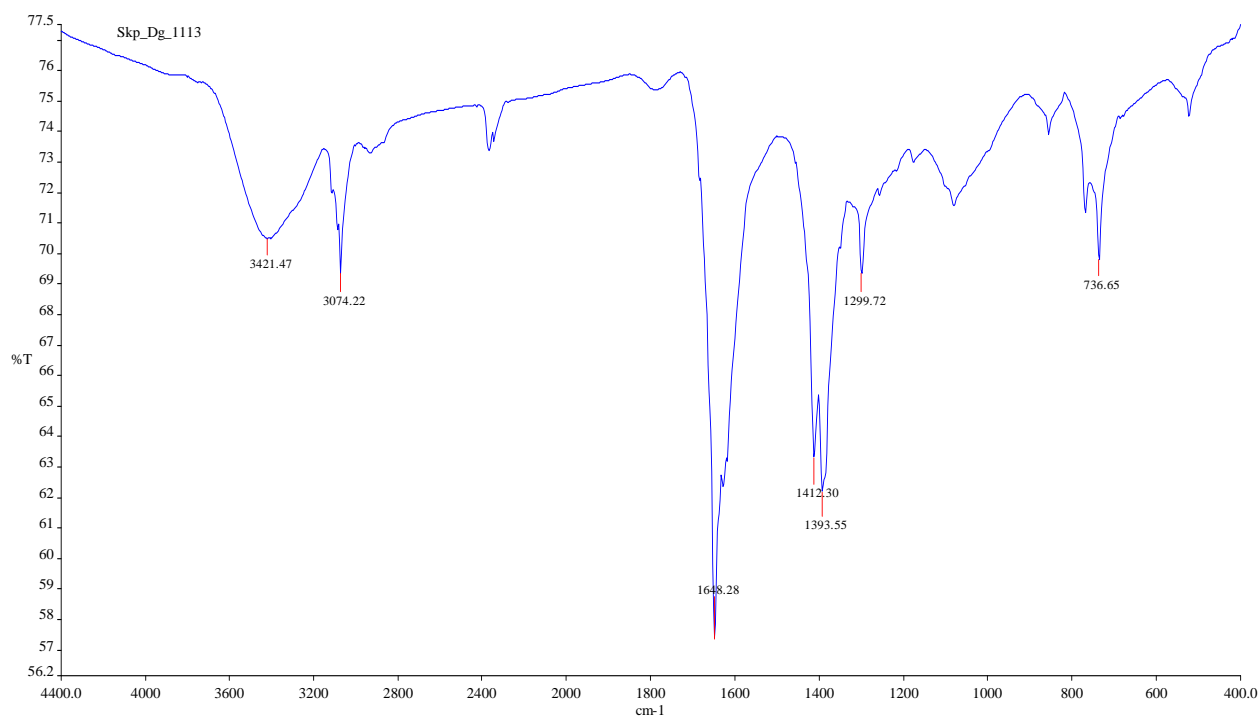

Fig S25: FTIR spectrum of 2

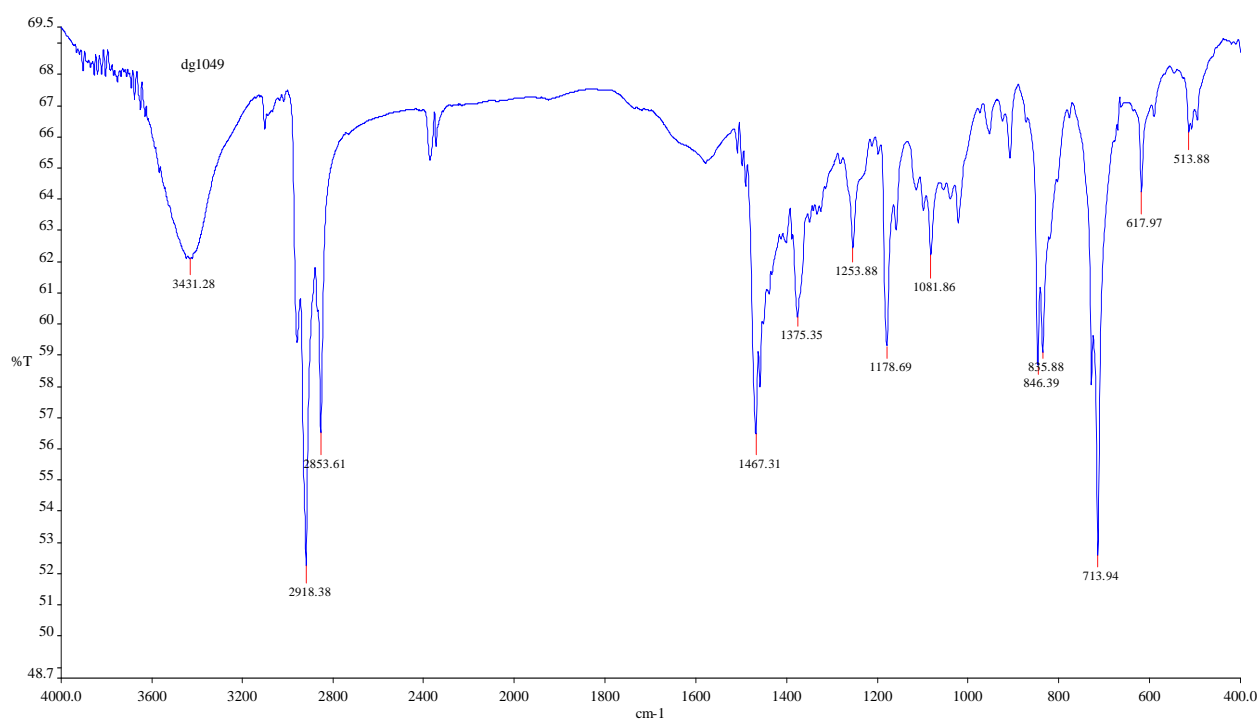

Fig S26: FTIR spectrum of 4a

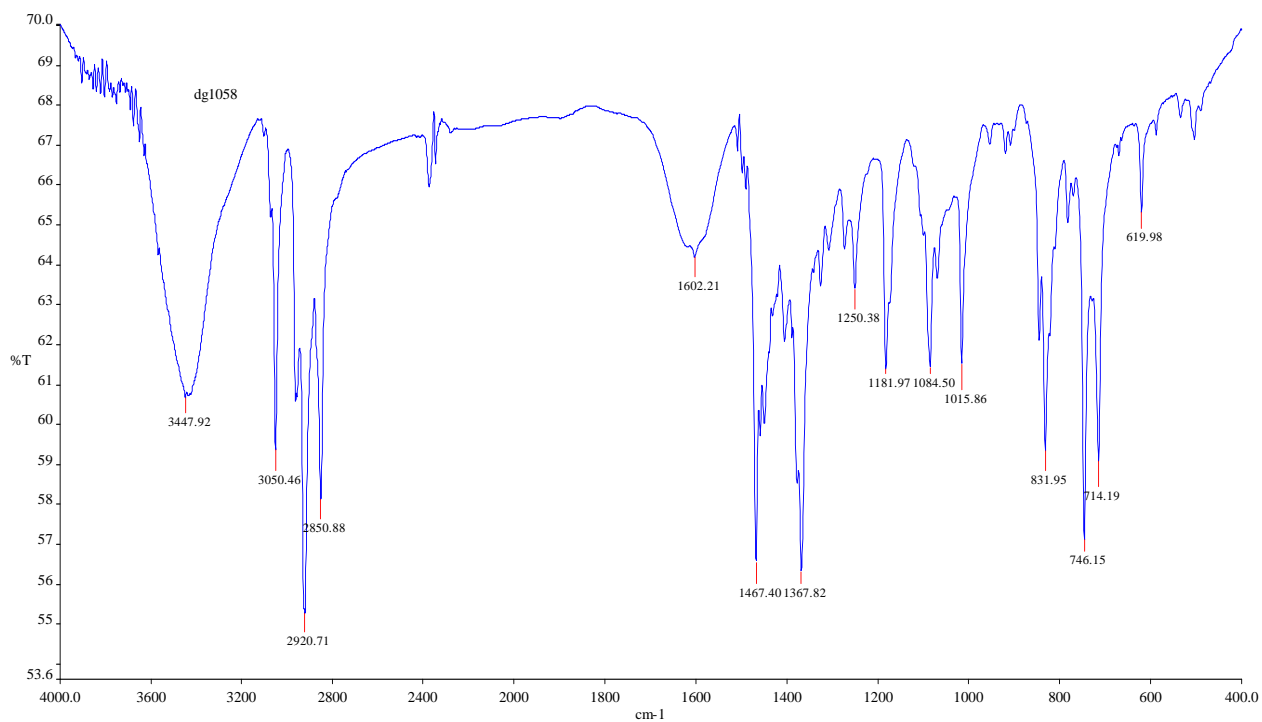

**Fig S27: FTIR spectrum of 4b**

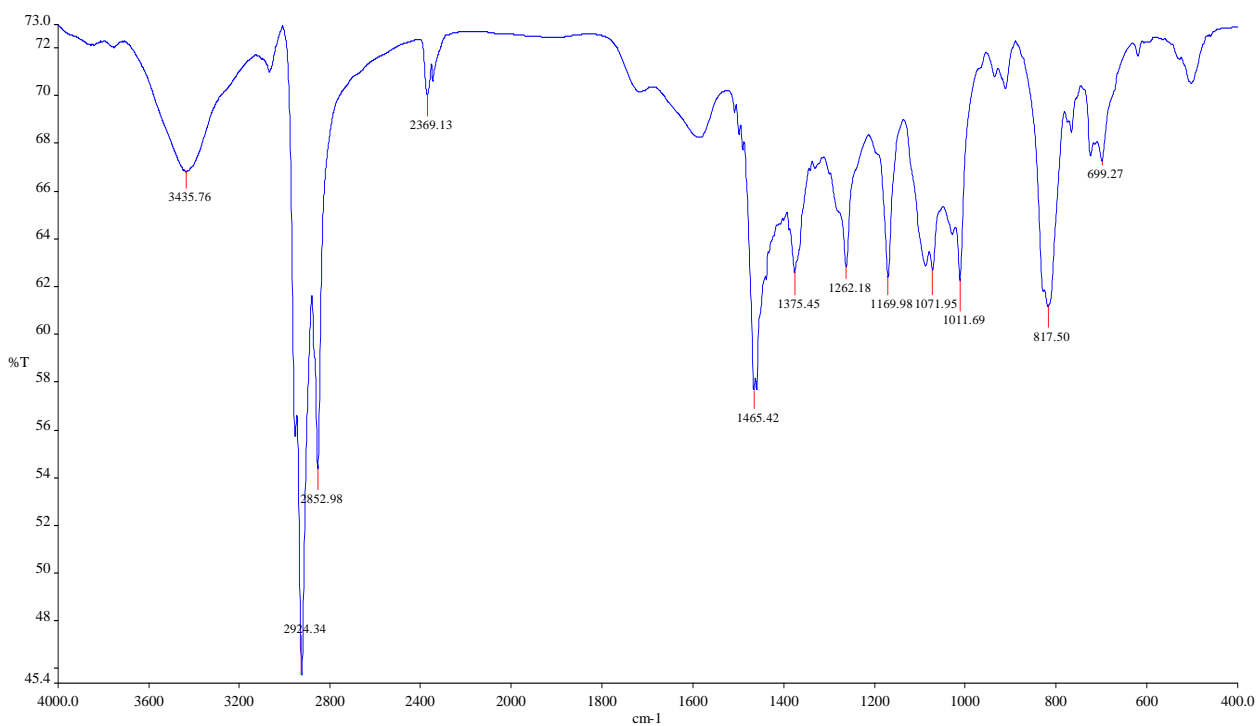

**Fig S28: FTIR spectrum of P2**

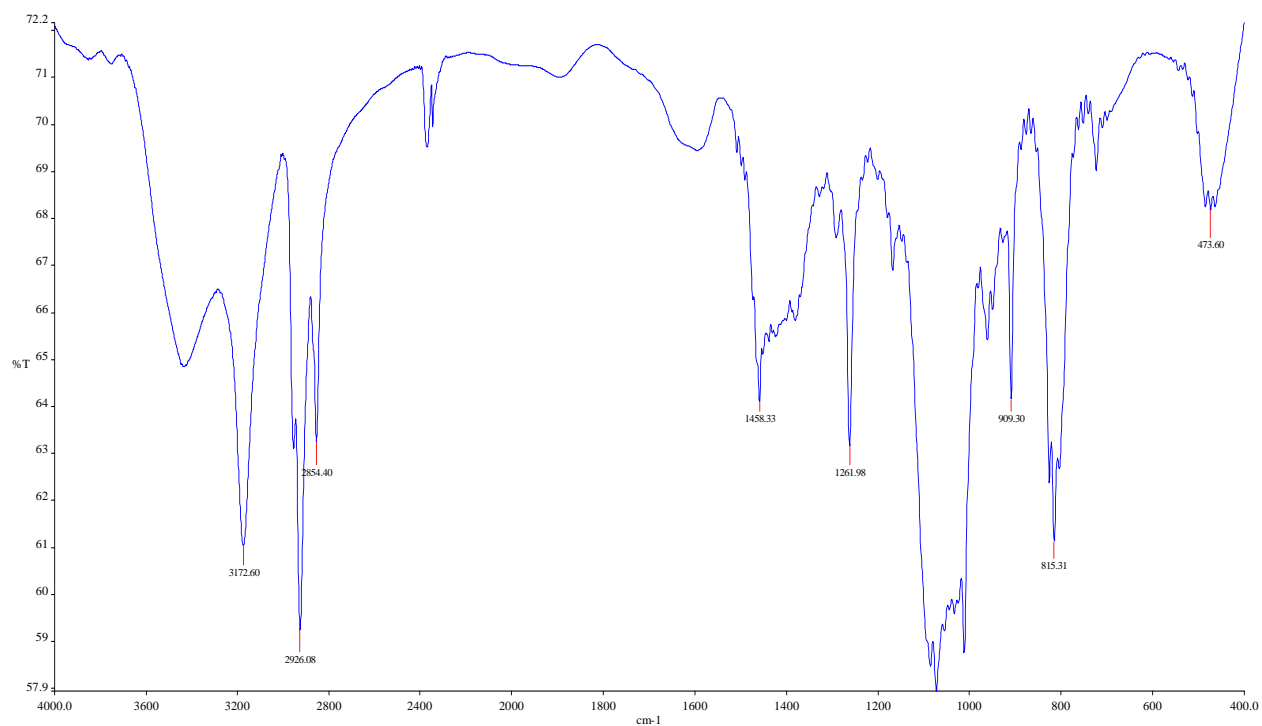

**Fig S29:** FTIR spectrum of  $[(4b)_2 \cdot Cu^{2+}]$

### 3. Crystallographic data of 4b

**Table S1.** Crystallographic Data and Refinement Parameters for **4b**.

|                                            | <b>4b</b>                                                       |
|--------------------------------------------|-----------------------------------------------------------------|
| Empirical formula                          | C <sub>24</sub> H <sub>23</sub> BrN <sub>2</sub> S <sub>2</sub> |
| Formula weight                             | 483.47                                                          |
| Crystal system                             | Triclinic                                                       |
| Space group                                | P $\bar{1}$                                                     |
| a, Å                                       | 5.3489(14)                                                      |
| b, Å                                       | 16.754(4)                                                       |
| c, Å                                       | 24.034(6)                                                       |
| $\alpha$ , deg                             | 89.741(8)                                                       |
| $\beta$ , deg                              | 89.969(9)                                                       |
| $\gamma$ , deg                             | 89.739(9)                                                       |
| V, Å <sup>3</sup>                          | 2153.8(10)                                                      |
| Z                                          | 4                                                               |
| $\rho_{\text{calcd}}$ , g cm <sup>-3</sup> | 1.491                                                           |
| $\mu$ , mm <sup>-1</sup>                   | 21.16                                                           |
| F(000)                                     | 992                                                             |
| Reflections                                |                                                                 |
| Collected                                  | 27149                                                           |
| independent                                | 8424                                                            |
| observed [I > 2 $\sigma$ (I)]              | 4551                                                            |

|                                                   |                 |
|---------------------------------------------------|-----------------|
| No. of variables                                  | 525             |
| Goodness-of-fit                                   | 0.953           |
| Final R indices [ $I > 2\sigma(I)$ ] <sup>a</sup> | $R_1 = 0.0610$  |
|                                                   | $wR_2 = 0.1357$ |
| R indices (all data) <sup>a</sup>                 | $R_1 = 0.1309$  |
|                                                   | $R_1 = 0.1696$  |

<sup>a</sup> $R_1 = \Sigma ||F_o| - |F_c|| / \Sigma |F_o|$  with  $F_o^2 > 2\sigma(F_o^2)$ .  $wR_2 = [\Sigma w(|F_o^2| - |F_c^2|)^2 / \Sigma |F_o^2|^2]$

#### 4a. Attempted GRIM polymerization

**Table S2:** Attempted GRIM polymerization of **5a** and **5b**.

| Sl. No | Reagent                                           | Solvent | Time (hours) | Polymer |
|--------|---------------------------------------------------|---------|--------------|---------|
| 1      | t-BuMgCl, Ni(dppp)Cl <sub>2</sub> , 60°C          | THF     | 48           | No      |
| 2      | i-PrMgBr, Ni(dppp)Cl <sub>2</sub> , 60°C          | THF     | 60           | No      |
| 3      | i-PrMgBr, Ni(dppp)Cl <sub>2</sub> , LiCl<br>60°C  | THF     | 48           | No      |
| 4      | CyclohexylMgBr, Ni(dppp)Cl <sub>2</sub> ,<br>60°C | THF     | 50           | No      |

#### 4b. Tetradetector GPC studies of P1 and P2

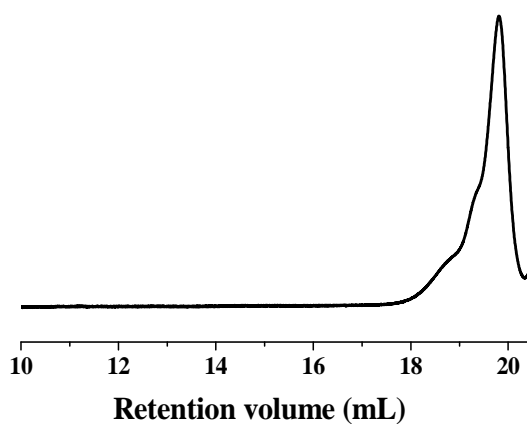

**Fig S30:** GPC trace, Refractive Index response of **P2**. PDI ( $M_w/M_n$ ) of **P2** was found to be 1.67.

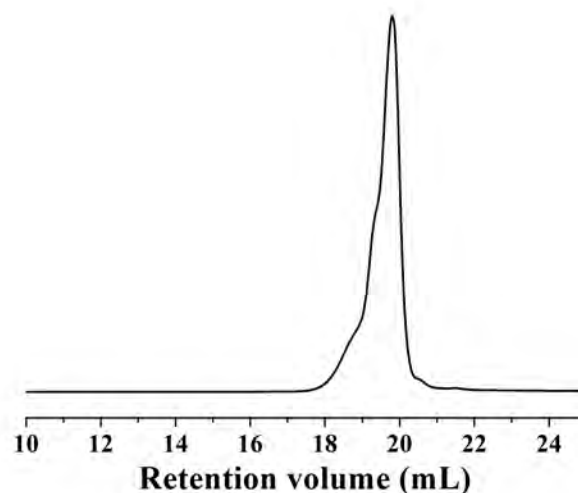

**Fig S31:** GPC trace, UV response of **P2** using THF as eluent.

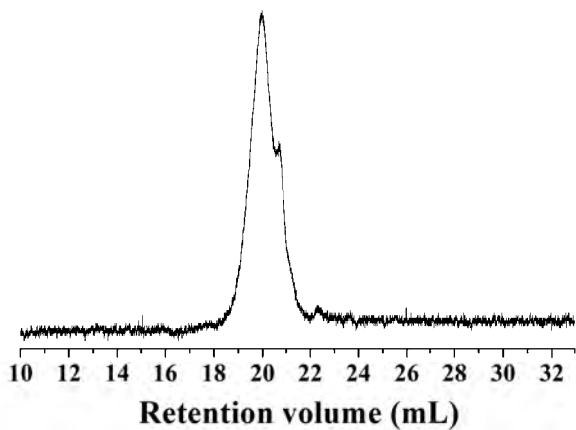

**Fig S32:** GPC trace, RALS response of **P2** using THF as eluent.

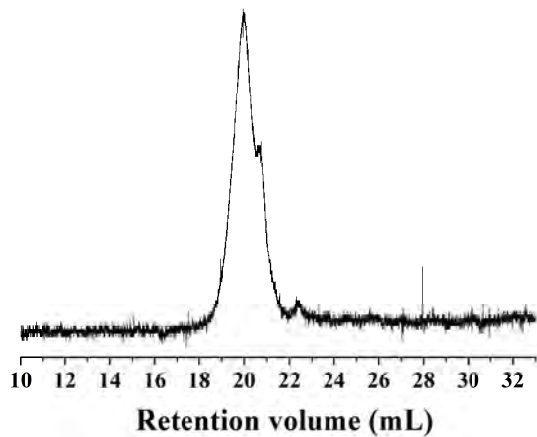

**Fig S33:** GPC trace, LALS response of polymer **P2** using THF as eluent.

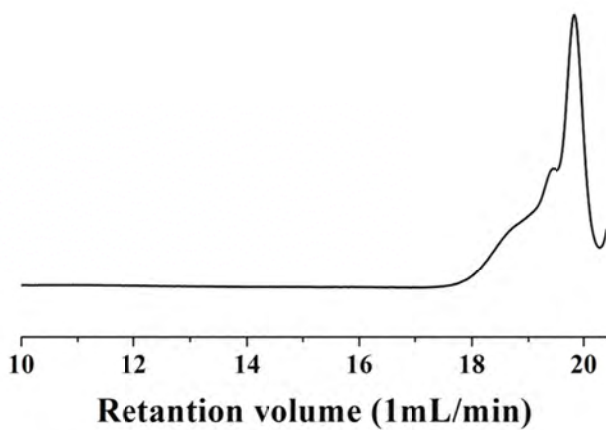

**Fig S34:** GPC trace, Refractive Index response of **P1**. PDI ( $M_w/M_n$ ) of **P1** was found to be 1.81.

## 5a. Photophysical properties of 4a and 4b

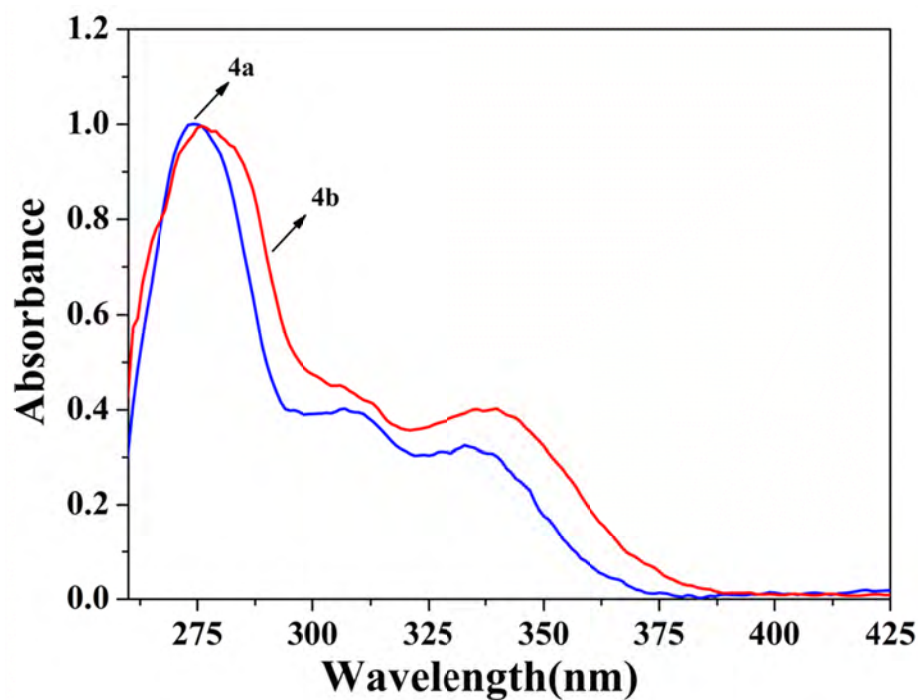

Fig S35: Absorbance spectra of **4a** and **4b** in DMSO:H<sub>2</sub>O(1:1) in  $\sim 2 \times 10^{-5}$  M

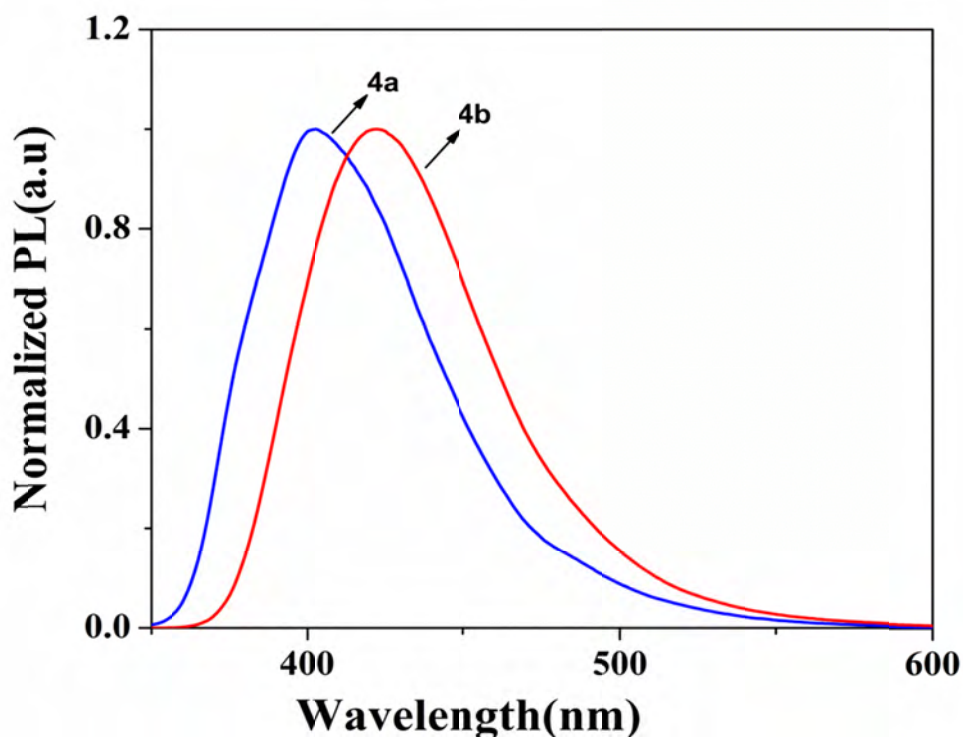

Fig S36: Emission spectra of **4a** and **4b** in DMSO:H<sub>2</sub>O(1:1) excited at 333 nm and 340 nm respectively.



## 5b. Photophysical response of 4a with various metal ion

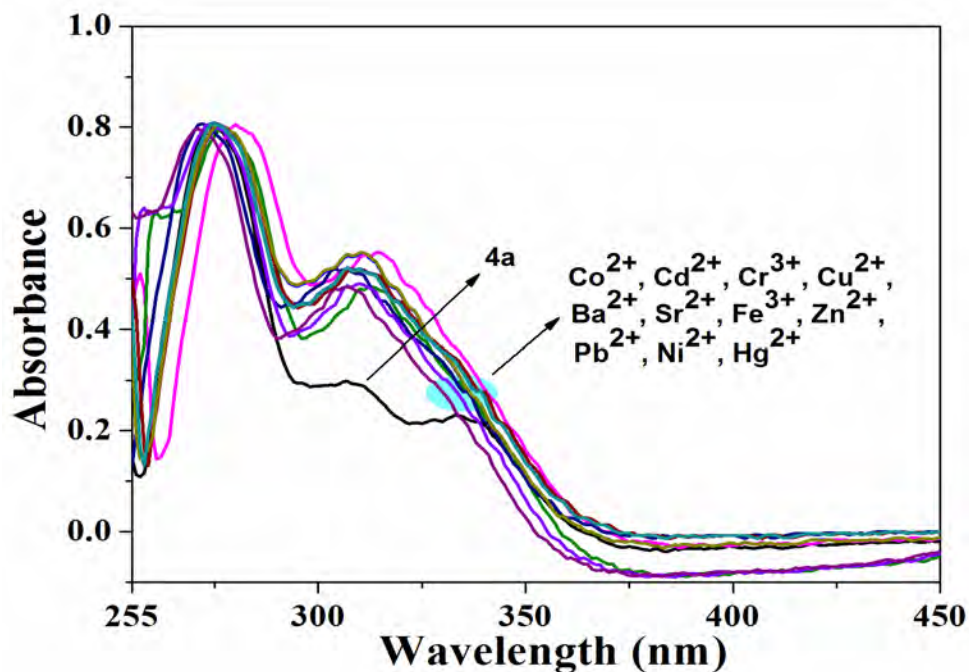

**Fig S37:** Absorbance spectra of **4a** ( $\sim 2 \times 10^{-5}$  M) in presence of different metal ion in DMSO:H<sub>2</sub>O (1:1)

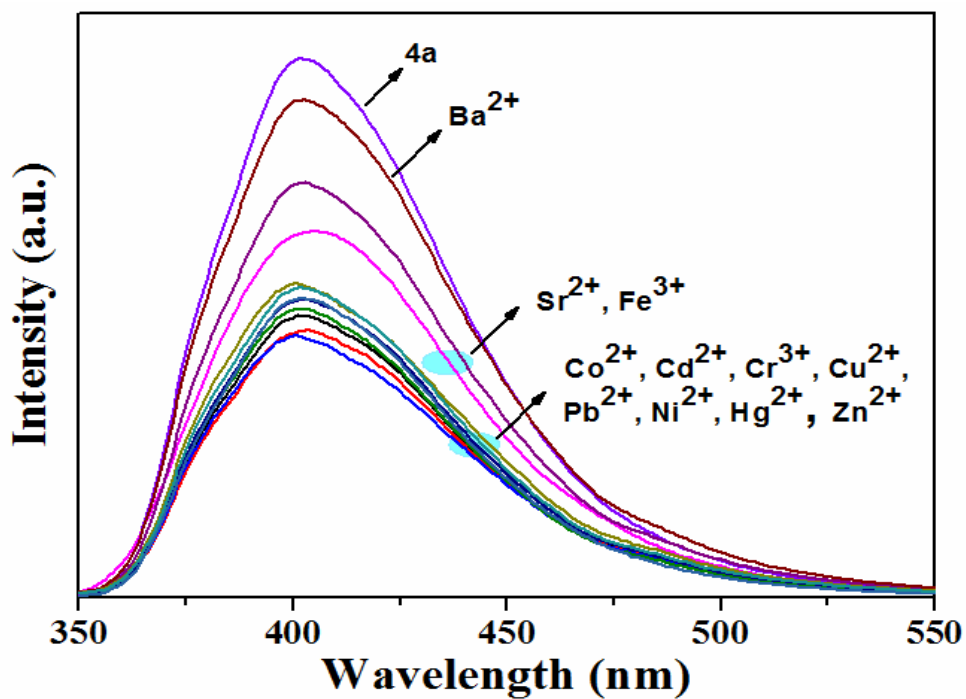

**Fig S38:** Emission spectra of **4a** ( $\sim 2 \times 10^{-5}$  M) in presence of different metal ion in DMSO:H<sub>2</sub>O (1:1) excited at 333 nm.

### 5c. Selective $\text{Cu}^{2+}$ reorganization studies by **4b**

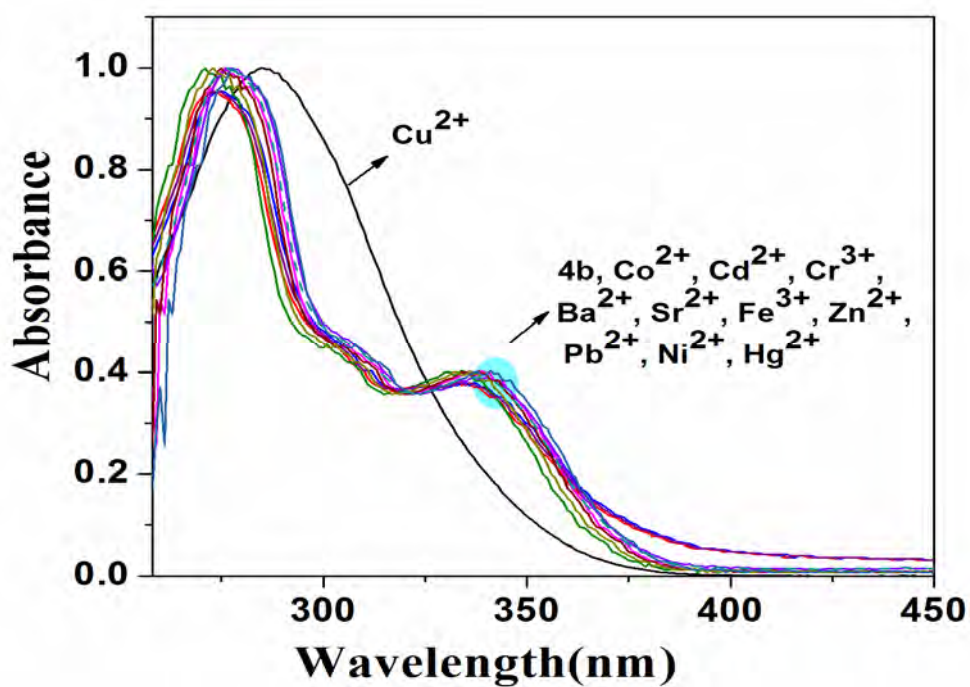

**Fig S39:** Absorption spectra of **4b** ( $\sim 2 \times 10^{-5}$  M) in presence of different metal ion in DMSO:H<sub>2</sub>O (1:1).

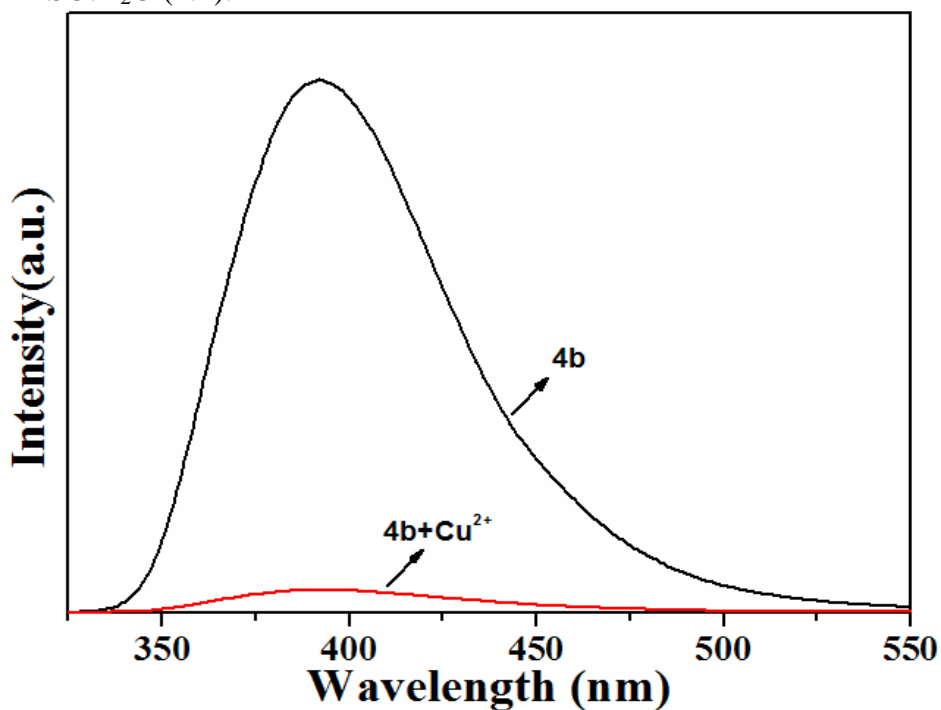

**Fig S40:** Emission spectra of **4b** ( $\sim 2 \times 10^{-5}$  M) and **4b** in presence of  $\text{Cu}^{2+}$  metal ion in DMSO:H<sub>2</sub>O (1:1) excited at 340 nm.

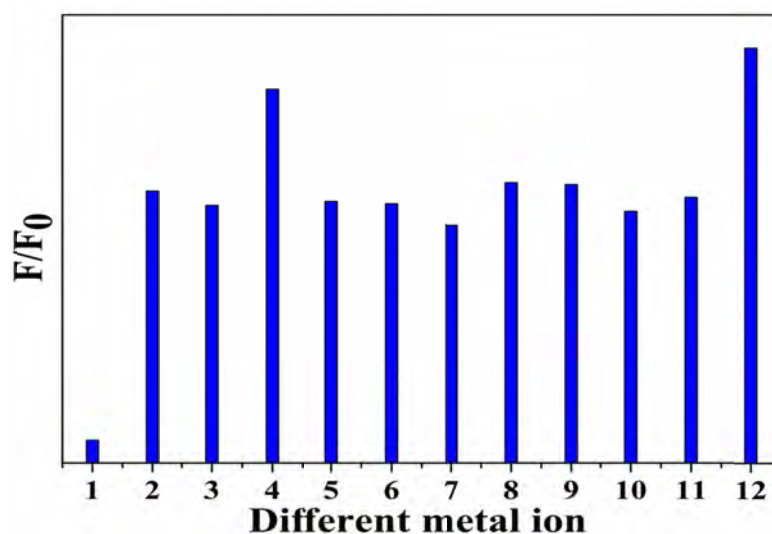

**Fig S41:** Selectivity sensing of **4b** in presence of different metal ion. 1-12 represent (1) **4b**+Cu<sup>2+</sup>; (2) **4b** + Cd<sup>2+</sup>; (3) **4b** + Sr<sup>2+</sup>; (4) **4b** + Ba<sup>2+</sup>; (5) **4b** + Co<sup>2+</sup>; (6) **4b** + Fe<sup>3+</sup>; (7) **4b** + Zn<sup>2+</sup>; (8) **4b** + Cr<sup>3+</sup>; (9) **4b** + Ni<sup>2+</sup>; (10) **4b** + Pb<sup>2+</sup>; (11) **4b** + Hg<sup>2+</sup>; (12) **4b**.

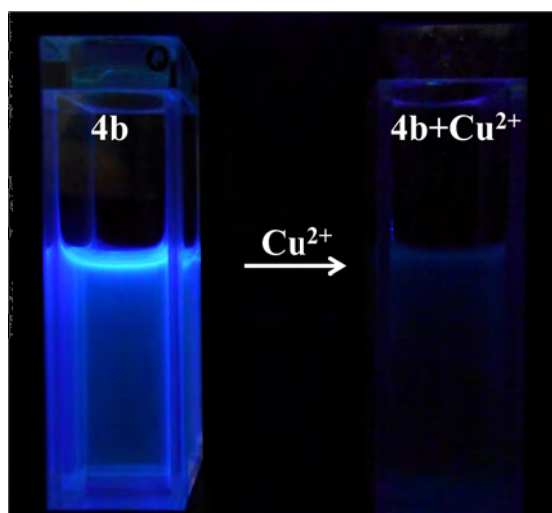

**Fig S42:** Photograph of **4b** and **4b** in presence of Cu<sup>2+</sup> metal ion in DMSO:H<sub>2</sub>O (1:1) under the illumination of 365 nm light.

## 5d. Titration studies by continuous variation of $\text{Cu}^{2+}$ ion concentration

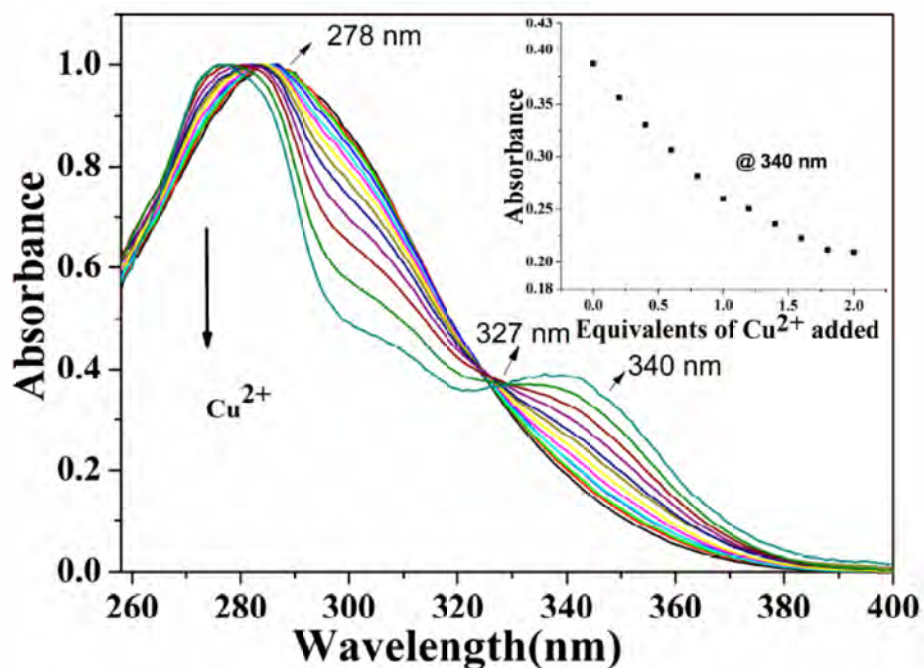

**Fig S43:** Absorbance spectra change of **4b** ( $\sim 2 \times 10^{-5}$ ) in DMSO:H<sub>2</sub>O (1:1) with increasing equivalent of  $\text{Cu}^{2+}$ .

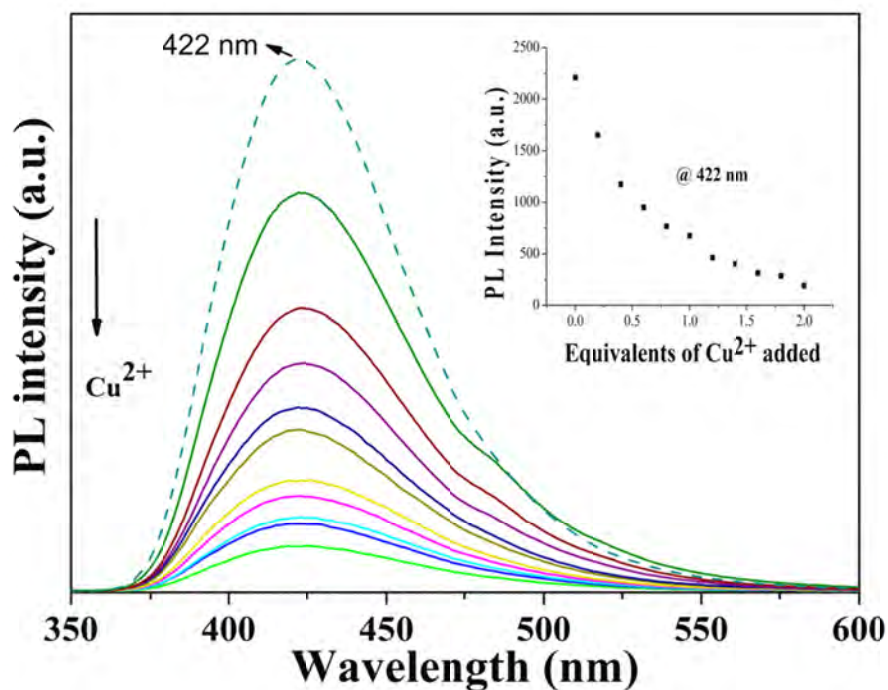

**Fig S44:** Emission spectral response of **4b** ( $\sim 2 \times 10^{-5}$ ) in DMSO:H<sub>2</sub>O (1:1) with increasing equivalent of  $\text{Cu}^{2+}$ .

### 5e. Stern-Volmer plot

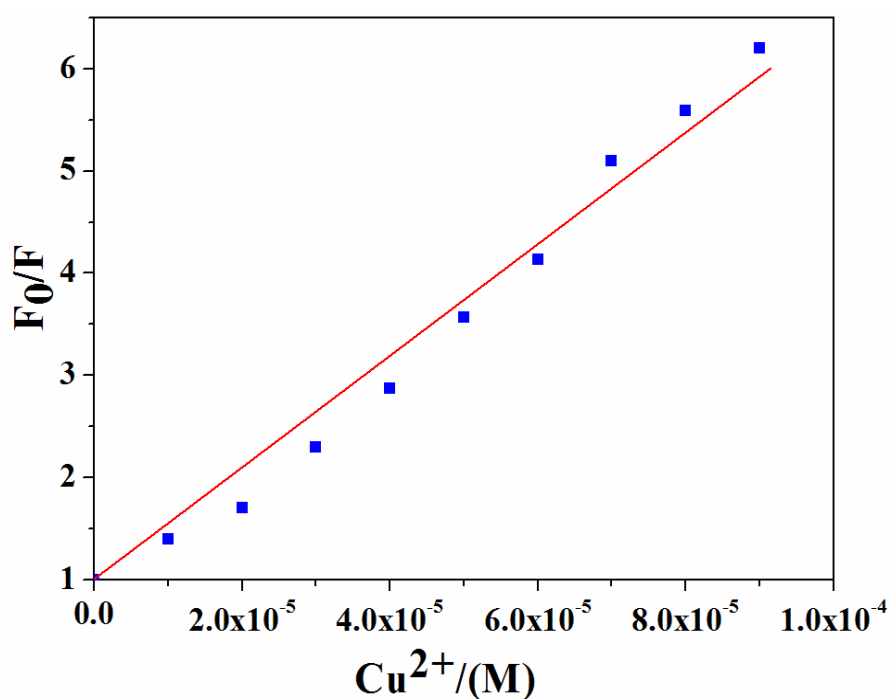

**Fig S45:** Stern-Volmer plot of **4b** and  $Cu^{2+}$  association. Where  $F_0$  is the fluorescence intensity in the absence of added quencher,  $F$  is the fluorescence intensity as a function of quencher concentration  $[Q]$ . The slope of the plots  $F_0/F$  vs  $[Q]$  gives the Stern-Volmer quenching constant ( $K_{SV}$ ) and linear relationship of  $[Q]$  with  $F_0/F$  implies the purely static quenching.

## 5f. Photophysical properties of P1 and P2

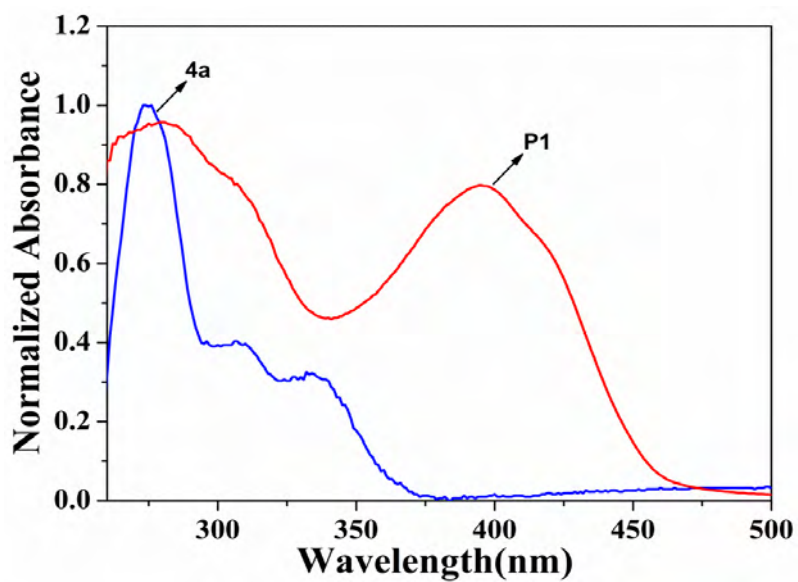

**Fig S46:** Absorbance spectra of **4a** and **P1** in DMSO:H<sub>2</sub>O(1:1) in  $\sim 2 \times 10^{-5}$  M.

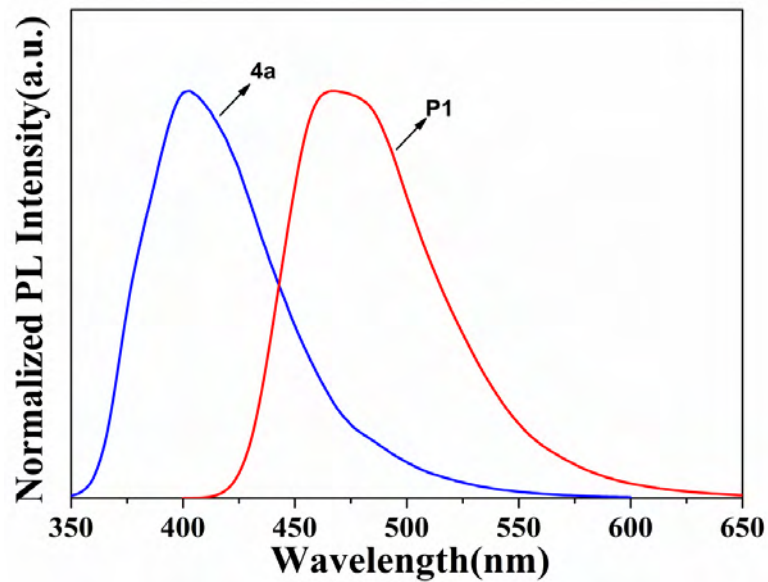

**Fig S47:** Emission spectra of **4a** and **P1** in DMSO:H<sub>2</sub>O(1:1) excited at 333 nm and 395 nm respectively.

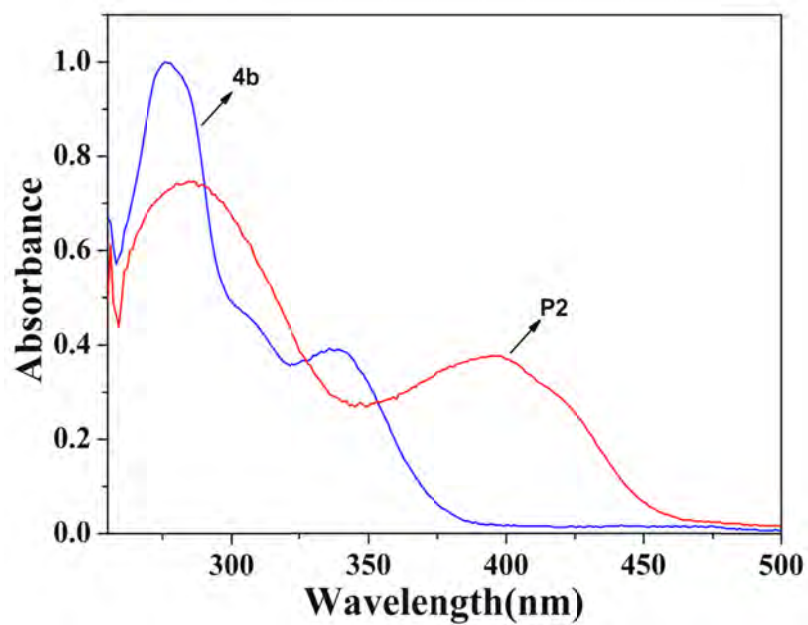

**FigS48:** Absorbance spectra of **4b** and **P2** in DMSO:H<sub>2</sub>O(1:1) in  $\sim 2 \times 10^{-5}$  M.

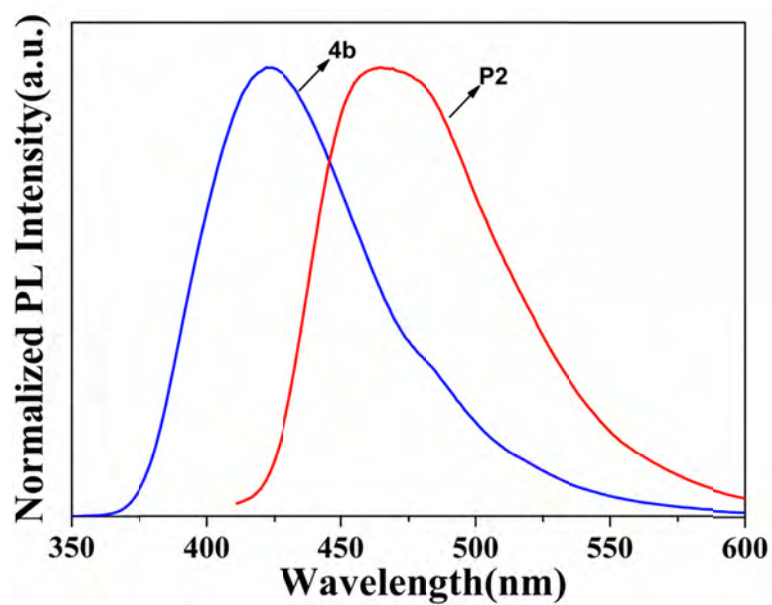

**Fig S49:** Emission spectra of **4b** and **P2** in DMSO:H<sub>2</sub>O(1:1) excited at 340 nm and 400 nm respectively.

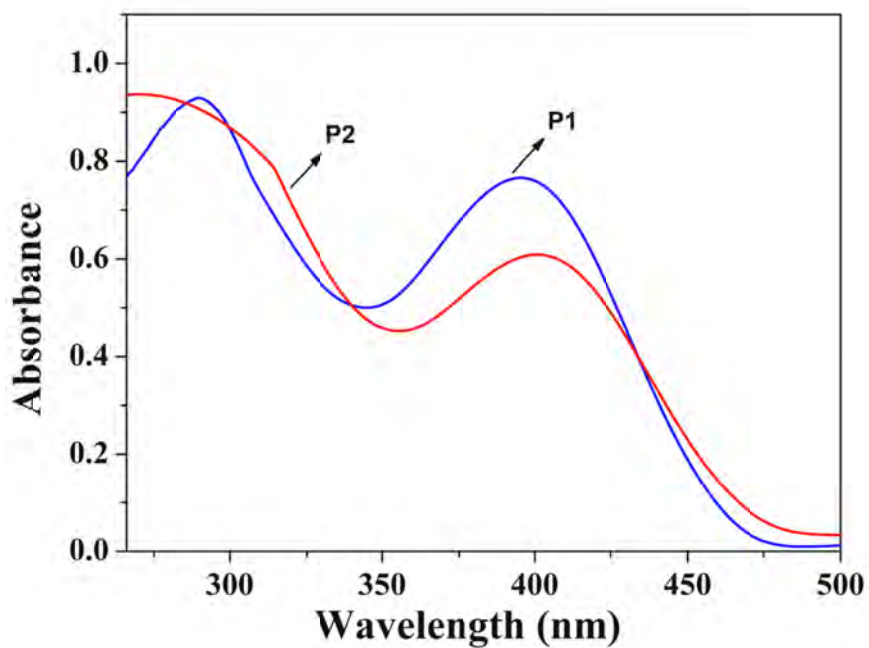

**Fig S50:** Absorbance spectra of **P1** and **P2** in DMSO:H<sub>2</sub>O(1:1).

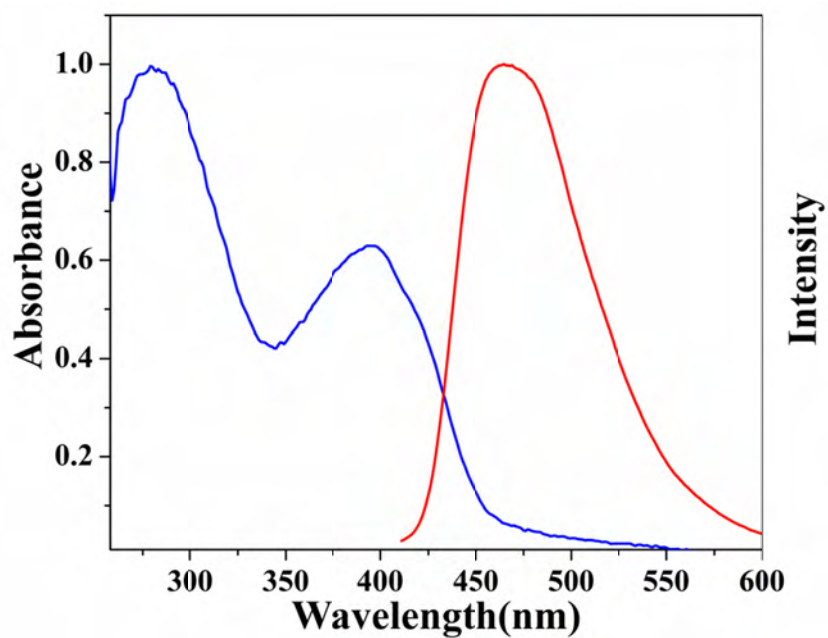

**Fig S51:** Absorbance and emission spectra of **P2** in DMSO:H<sub>2</sub>O(1:1) in  $2 \times 10^{-5}$  M.



## 5g. Determination of Limit of Detection (LOD)

The limit of detection (LOD) was calculated from the following equation.<sup>4</sup>

$LOD = 3\sigma/s$ , where ' $\sigma$ ' is the standard deviation of blank measurements, and ' $s$ ' is the slope between fluorescence intensity and  $Cu^{2+}$  concentration.

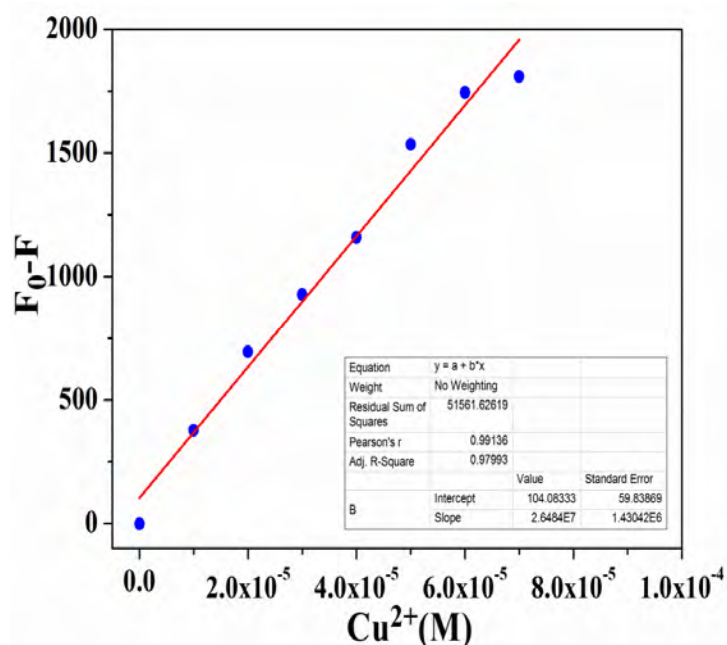

**Fig S52a:** Changes of Fluorescence Intensity of **4b** ( $2 \times 10^{-5}$  M in 1:1 DMSO- $H_2O$ ) as a function of  $[Cu^{2+}]$  at 422 nm.

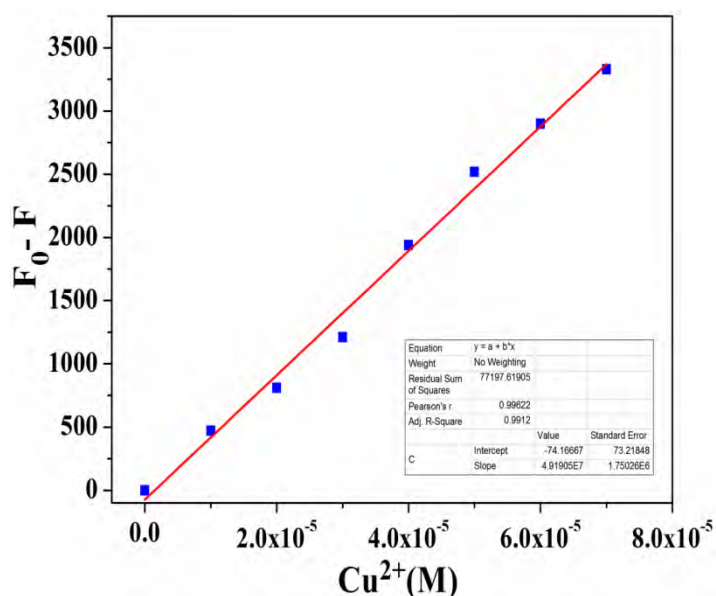

**Fig S52b:** Changes of Fluorescence Intensity of **P2** ( $2 \times 10^{-5}$  M in 1:1 DMSO- $H_2O$ ) as a function of  $[Cu^{2+}]$  at 468 nm.

## 5h. Calculation of HOMO and LUMOs of the fluorophores by electrochemical studies and proposed mechanism of PL quenching through electron transfer.

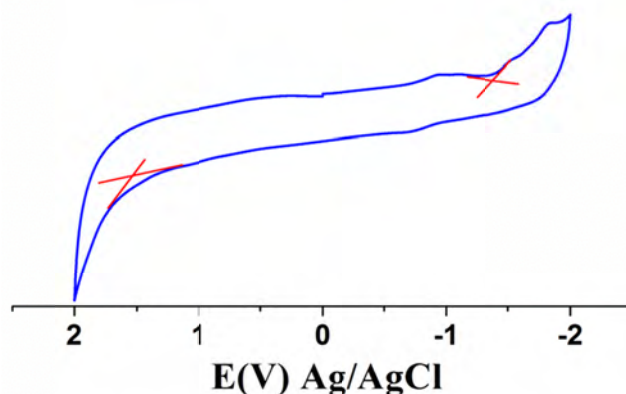

**Fig S53a:** Cyclic voltammogram of **4a**, film casted on GC disc working electrode using TBAPF<sub>6</sub> as supporting electrolyte in MeCN, Ag/AgCl as reference electrode and Pt wire as auxiliary electrode. Scan rate at 100 mV/s.

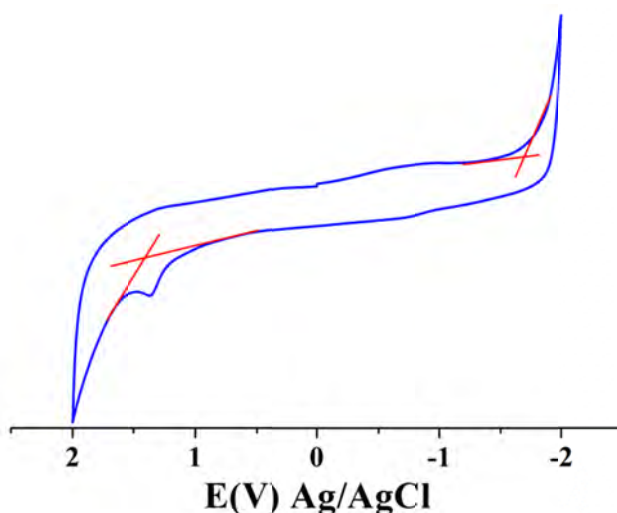

**Fig S53b:** Cyclic voltammogram of **4b**, film casted on GC disc working electrode using TBAPF<sub>6</sub> as supporting electrolyte in MeCN, Ag/AgCl as reference electrode and Pt wire as auxiliary electrode. Scan rate at 100 mV/s.

**Determination of HOMO and LUMO from CV studies:** The HOMO and LUMO energy levels for **4a** and **4b** in solid state were estimated by conventional electrochemical techniques. The solution of **4a** and **4b** were drop casted onto the glossy carbon disc electrode from their DCM solutions. Cyclic voltammetry of films of **4a** and **4b** (prepared by drop casting) were performed in CH<sub>3</sub>CN using *n*-Bu<sub>4</sub>NPF<sub>6</sub> as the supporting electrolyte. Ag/AgCl and Pt wire were used as reference and auxiliary electrodes respectively. The HOMO energy level ( $E_{HOMO}$ ) was calculated from the onset oxidation potential ( $E_{onset}$ ) using the following equation:  $E_{HOMO} = - ( E_{onset}^{ox} + 4.4 )$  eV, and the LUMO energy level ( $E_{LUMO}$ ) was calculated from the onset reduction potential ( $E_{onset}$ ) using the following equation:  $E_{LUMO} = - ( E_{onset}^{red} + 4.4 )$  eV, where the energy level was calibrated against the Ag/AgCl couple.

| Fluorophore | $E_{\text{HOMO}}$ (eV) <sup>a</sup> | $E_{\text{LUMO}}$ (eV) <sup>b</sup> | $E_g$ (eV) |
|-------------|-------------------------------------|-------------------------------------|------------|
| <b>4a</b>   | -5.93                               | -3.02                               | 2.91       |
| <b>4b</b>   | -5.79                               | -2.71                               | 3.08       |

**Fig S54a:** Electron transfer mechanism involving the excited **4b** and  $d^9 \text{Cu}^{2+}$  ion in an elongated octahedral coordination environment (having the unpaired electron in  $d_{x^2-y^2}$  orbital) leading to PL quenching.

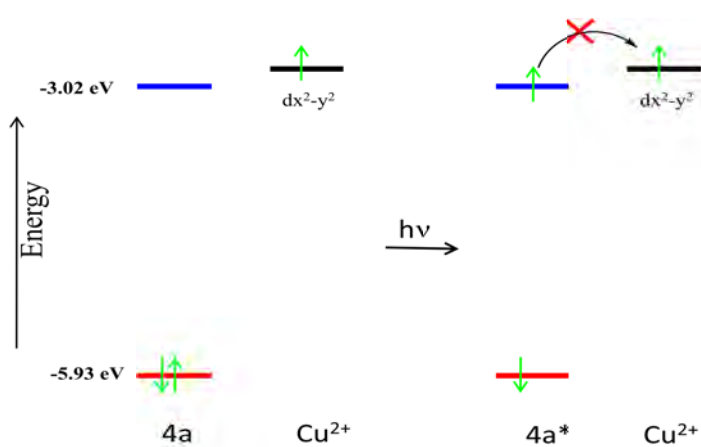

**Fig S54b:** Demonstration of the unsuccessful electron transfer involving the excited **4a** and  $d^9 \text{Cu}^{2+}$  ion in an elongated octahedral coordination environment (having the unpaired electron in  $d_{x^2-y^2}$  orbital) leading no change in PL intensity.

## 5i. Electrochemical characterization 4b.Cu<sup>2+</sup> and P2.Cu<sup>2+</sup>

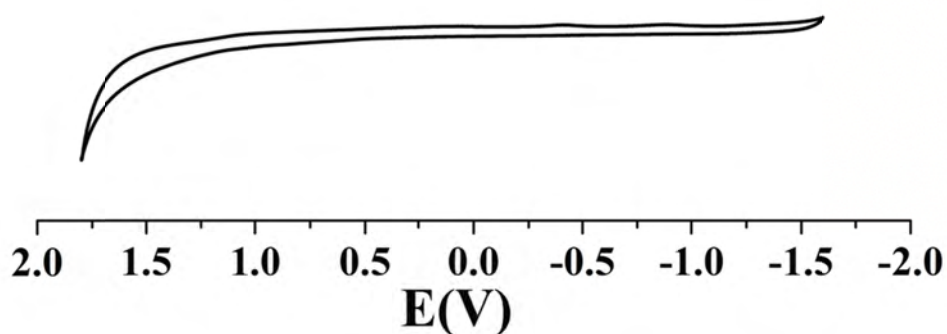

**Fig S55a:** Cyclic voltammogram of DMF using [(*n*-Bu)<sub>4</sub>N]PF<sub>6</sub> as supporting electrolyte (Blank run), Pt disc working electrode, Pt wire auxiliary electrode and Ag/AgCl reference electrode. Scan rate at 100mV/s.

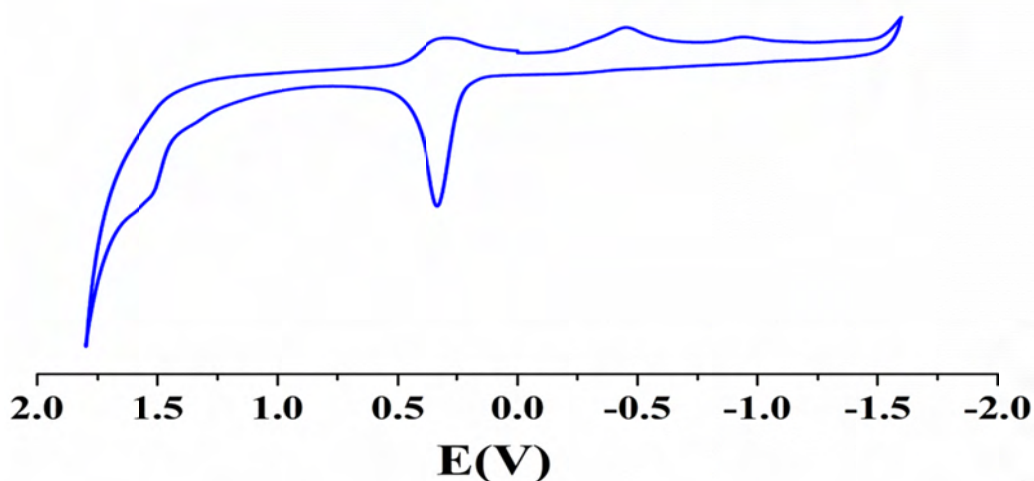

**Fig S55b:** Cyclic voltammogram of 4b.Cu<sup>2+</sup> in DMF using [(*n*-Bu)<sub>4</sub>N]PF<sub>6</sub> as supporting electrolyte, Pt disc working electrode, Pt wire auxiliary electrode and Ag/AgCl reference electrode. Scan rate at 100mV/s.

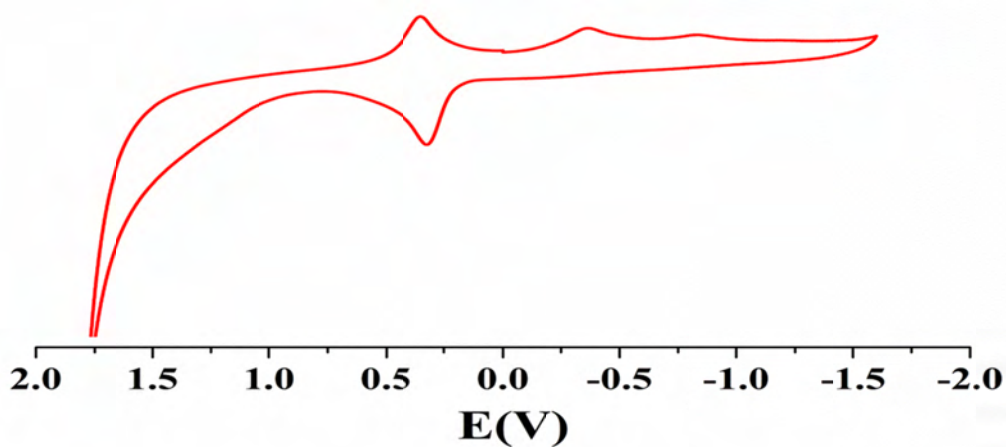

**Fig S55c:** Cyclic voltammogram of P2.Cu<sup>2+</sup> in DMF using TBAPF<sub>6</sub> as supporting electrolyte, Pt disc working electrode, Pt wire auxiliary electrode and Ag/AgCl reference electrode. Scan rate at 100mV/s.

### 5j. $\text{Cu}^{2+}$ sensing by thin film of P2 with time

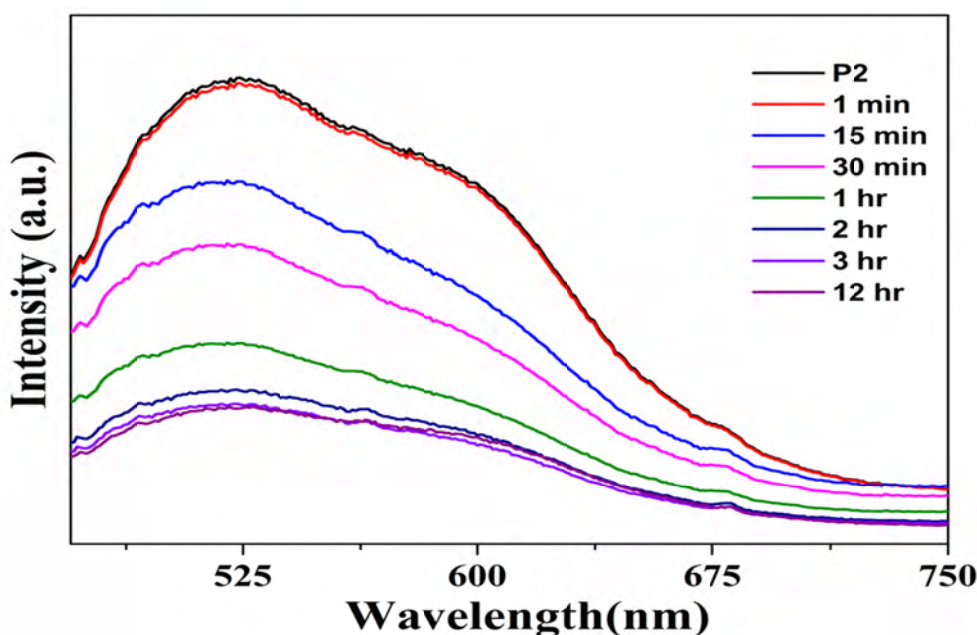

**Fig S56:** Solid state PL spectra of **P2** thin film (on quartz plate) dipped in  $\text{Cu}^{2+}$  solution with increasing dipping time.

### 5k. SEM and EDX analysis of P2 and $\text{P2.Cu}^{2+}$

#### Preparation of sample for SEM and EDX analysis:

After cleaning the quartz substrate (described previously in page 2, SI), thin film of the polymer **P2** was prepared by spin coating on a 1.7 cm x 1.5 cm quartz plate. A solution of **P2** in toluene ( $\sim 5 \times 10^{-4}\text{M}$ ) was dropped on the quartz plate and it was spin coated at 5000 rpm for 60 second followed by 8000 rpm for 120 seconds. The surface morphology (by SEM) and EDX analysis were performed. The same polymer film was dipped in aqueous  $\text{Cu}^{2+}$  solution for 30 min followed by repetitive and extensive washing(at least 20 times) by Milli-Q water to remove any unbound (free)  $\text{Cu}^{2+}$  ion. The surface morphology and EDX analysis were analyzed. Formation of  $\text{Cu}^{2+}$  coordinated metallopolymer ( $\text{P2.Cu}^{2+}$ ) was confirmed by EDX analysis. Silicone is from the quartz substrate.

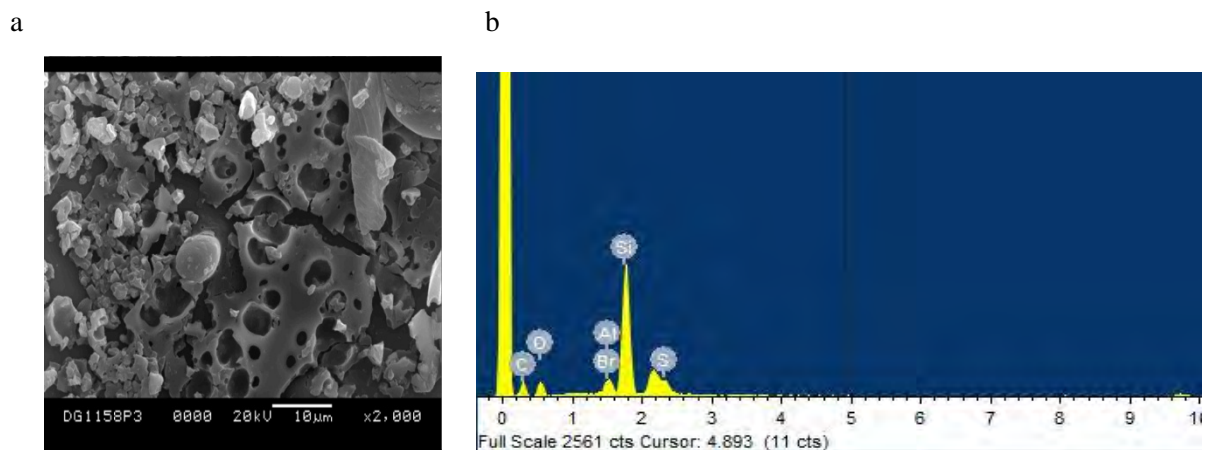

**Fig S57:** a) SEM image of Polymer **P2** film on quartz plate, b) EDX analysis of polymer **P2**.

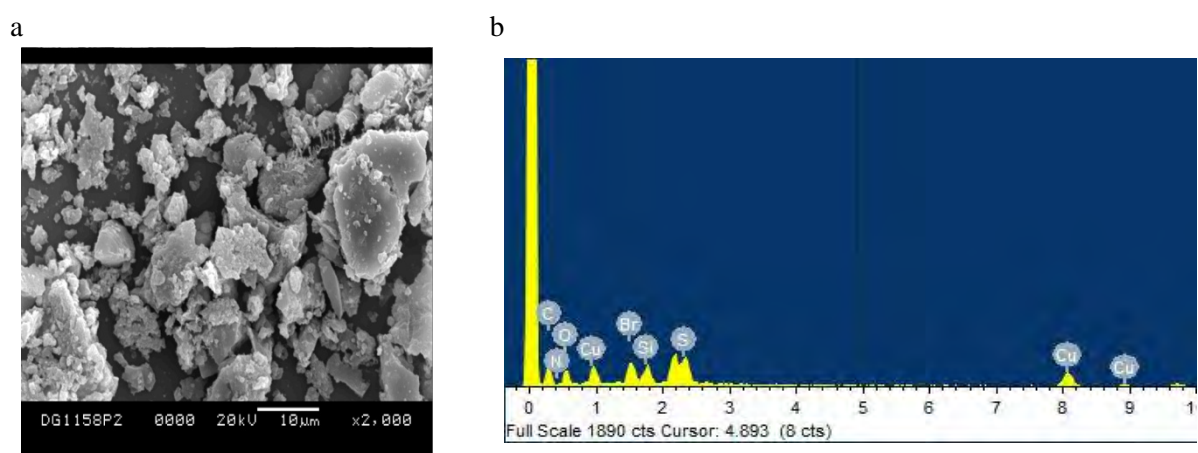

**Fig S58:** a) SEM image of  $\text{Cu}^{2+}$  coordinated Polymer **P2** film on quartz plate, b) EDX analysis of  $\text{Cu}^{2+}$  coordinated polymer **P2**.

#### References:

1. J. R. Lakowicz, *Principles of Fluorescence Spectroscopy*; Plenum: New York, 1999; Vol. 2.
2. D. F. J. Arago, and J. B. Biot, *Mem. Acad. Fr.* 1806, 7.
3. A. Chakraborty, D. Chakrabarty, P. Hazra, D. Seth, N. Sarkar, *Chem. Phys. Lett.* 2003, **382**, 508.
4. (a) IUPAC Commission on Spectrochemical and Other Optical procedures for Analysis, *Pure. Appl. Chem.*, 1976, **45**, 107;(b) Y. Chen, C. Zhu, J. Yang, J. Li, Y. Jiao, W. He, J. Chen and Z. Guo, *Chem. Commun*, 2012, **48**, 5094.
